1  
2  
3  
4  
5  
6  
7  
8  
9  
10  
11  
12  
13  
14  
15  
16  
17  
18  
19  
20  
21  
22

## Small Molecule Protein Assembly Modulators with Pan-Cancer Therapeutic Efficacy

**Authors:** Anuradha F. Lingappa<sup>#1</sup>, Olayemi Akintunde<sup>#1</sup>, Connie Ewald<sup>1</sup>, Markus Froehlich<sup>1</sup>, Niloufar Ziari<sup>1</sup>, Maya Michon<sup>1</sup>, Shao Feng Yu<sup>1</sup>, Suguna Mallesh<sup>1</sup>, Jim Lin<sup>1</sup>, Anatoliy Kitaygorodskyy<sup>1</sup>, Dennis Solas<sup>1</sup>, Jonathan C. Reed<sup>2</sup>, Jaisri R. Lingappa<sup>2</sup> Andreas Mueller-Schiffmann<sup>3</sup>, Carsten Korth<sup>3</sup>, Dharma Prasad<sup>1</sup>, Aysegul Nalca<sup>4</sup>, Emily Aston<sup>5</sup>, Brad Fabbri<sup>5</sup>, Sanjeev Anand<sup>6</sup>, Thomas W. Campi<sup>6</sup>, Emma Petrouski<sup>1</sup>, Debendranath Dey<sup>1</sup>, David W. Andrews<sup>7</sup>, and Vishwanath R. Lingappa<sup>1,8,\*</sup>

### Affiliations:

<sup>1</sup>Prosetta Biosciences, San Francisco, CA USA

<sup>2</sup> Dept. of Global Health, University of Washington, Seattle, WA, USA.

<sup>3</sup>Institute of Neuropathology, Heinrich Heine University, Dusseldorf, Germany

<sup>4</sup>United States Army Medical Research Institute for Infectious Diseases, Fredrick MD, USA

<sup>5</sup>TechAccel, Overland Park, KS, USA

<sup>6</sup>Modulant Biosciences, Pendleton, IN, USA

<sup>7</sup>Sunnybrook Research Institute, Toronto, ON, Canada

<sup>8</sup>University of California, San Francisco, CA, USA

<sup>#</sup>Co-first authors who contributed equally to this work

\*To whom correspondence should be addressed at [vlingappa@prosetta.com](mailto:vlingappa@prosetta.com)

## 23 Abstract

24 Two structurally-unrelated small molecule chemotypes, represented by compounds PAV-617 and PAV-  
25 951 with antiviral activity in cell culture against monkeypox virus (MPXV) and human immunodeficiency  
26 virus (HIV) respectively, were studied for anti-cancer efficacy. Each exhibited apparent pan-cancer  
27 cytotoxicity, reasonable pharmacokinetics, and non-toxicity in mice at active concentrations. Anti-tumor  
28 properties of both chemotypes, were validated in mouse xenografts against A549 human lung cancer  
29 and, for one of the chemotypes, against HT-29 colorectal cancer. The targets of these compounds are  
30 unconventional: each binds to a different transient, energy-dependent multi-protein complex containing  
31 the protein TRIM28/KAP1, an allosteric modulator known to regulate mechanisms underlying viral and  
32 nonviral disease states including cancer. Treatment with these compounds alters the target multi-  
33 protein complexes in a manner consistent with allosteric modulation as their mechanism of action.  
34 These compounds appear to remove a block, crucial for cancer survival and progression, on the  
35 homeostatic linkage of uncontrolled cellular proliferation to apoptosis. These compounds provide  
36 starting points for development of next-generation non-toxic, pan-cancer therapeutics.

37

## 38 Background

39 The similarity of the interactions of viral infection and cancer with the healthy host has often  
40 been noted (1). Both represent pathological processes of extremely diverse origin, that overcome the  
41 complex feedback controls of homeostasis, to the detriment of the host (2). Both exploit natural  
42 selection as a powerful weapon to overcome host defenses. Viruses have done so over deep  
43 evolutionary time through co-evolution with their hosts and through the emergency of resistance  
44 mutations in response to the selective pressure of treatments (3,4). Cancers regularly use the latter  
45 mechanism, resulting in clonal mutants that drive cancer progression (5).

46           At least seven different viruses-- Epstein-Barr virus (EBV), hepatitis B virus (HBV), hepatitis C  
47 virus (HCV), human T-lymphotropic virus 1 (HTLV-1), human papillomavirus (HPV), Kaposi sarcoma-  
48 associated herpesvirus (KHSV or HHV-8), and Merkel cell polyomavirus (MCPyV)—are known to be  
49 directly oncogenic through their alteration of the cellular environment and/or impairment of the host's  
50 innate immune system defenses (6,7). It has therefore been proposed that viruses could play a key role  
51 in the discovery of new cancer treatments by identifying cellular targets that drive tumorigenesis (8).

52           The incompleteness in our current understanding of the dynamics of host homeostasis and its  
53 myriad of feedback controls has been a disadvantage for efforts to design novel therapeutic  
54 countermeasures against both viruses and cancer. However, a recent unconventional approach to  
55 antiviral drug discovery has identified small molecules targeting host allosteric sites essential for  
56 homeostasis, that are repurposed by viral infection (9). The antiviral compounds identified by this  
57 approach appear to restore key features essential to host homeostasis (9). We wished to determine  
58 whether those compounds might have therapeutic applicability against cancer, given the analogy in how  
59 both viruses and cancers drive departure from homeostasis. The results to be presented here suggest  
60 this is the case and shed light on molecular pathways relevant for both viral and neoplastic disease,  
61 providing a strategy for development of novel cancer cell therapeutics.

62           Utilizing a cell-free protein synthesis and assembly (CFPSA) system, compounds from a library of  
63 approximately 150,000 drug-like small molecules were screened for hits which blocked the assembly of  
64 viral capsids without inhibiting protein synthesis (9–12). Hit compounds identified have been termed  
65 “protein assembly modulators”. A collection of 300 structurally-diverse protein assembly modulators  
66 were identified from hits demonstrating activity against capsid assembly in one or more viral family (9).  
67 Antiviral protein assembly modulators from this collection have been validated against infectious virus  
68 in cell culture for multiple viral families including *Retroviridae*, *Rhabdoviridae*, *Poxviridae*, *Adenoviridae*,  
69 *Herpesviridae*, *Paramyxoviridae*, *Coronaviridae*, *Orthomyxoviridae*, and *Picornaviridae* (9,11–13). In two

70 cases, *Coronaviridae* and *Paramyxoviridae*, cellular antiviral activity has been confirmed in animal  
71 disease models (9).

72           These antiviral protein assembly modulators appear to target host-viral protein-protein  
73 interactions via allosteric sites that control repurposing of host assembly machinery for viral capsid  
74 formation and which also allow disengagement of host innate immune defenses such as autophagy (9).  
75 In an earlier study, a class of protein assembly modulators was shown to change the composition of a  
76 transient, energy-dependent multi-protein complex whose components include p62/SQSTM1, a key  
77 regulator of autophagy (9). This multi-protein complex is co-opted upon viral infection and modified in  
78 composition. p62/SQSTM1 is lost from the complex, and the viral nucleoprotein added (9). Upon  
79 treatment with an antiviral protein assembly modulator, the target multi-protein complex is restored to  
80 its composition in uninfected cells, with loss of the viral nucleoprotein component and restoration of  
81 p62/SQSTM1 (9).

82           The discovery of dynamic multi-protein complexes whose composition changes with drug  
83 treatment offers a new means of parsing out post translational protein heterogeneity and its relevance  
84 for diseased states. The amount of a given protein that has been observed in the multi-protein  
85 complexes targeted by antiviral assembly modulators comprises only a very small fraction of the total  
86 amount of the component proteins present in a cell (9). The role played by the subset of the protein that  
87 is part of a particular multi-protein complex may reflect a “moonlighting” function, as observed for a  
88 growing number of cellular and viral proteins (14–16).

89           We hypothesized that if an overlap between viral and oncogenic pathways exists, some antiviral  
90 assembly modulators might be capable of disrupting a multi-protein complex associated with a hallmark  
91 of cancer (17,18). To test the hypothesis, we established a cancer-relevant counter screen and applied it  
92 to previously-identified antiviral protein assembly modulator compounds. In this paper, we will describe

93 two protein assembly modulators which were originally characterized for their antiviral properties but  
94 are now shown to have potential as cancer therapeutics based on *in vitro* screening and *in vivo*  
95 validation studies. Just as the previously cited study discovered a pan-respiratory antiviral chemotype  
96 that appears to target a host-viral interface, so also we hypothesized that it should be possible to find a  
97 comparable anti-cancer chemotype that reverses changes selected by the cancer for allowing it to  
98 escape from feedback constraints that normally prevent uncontrolled proliferation.

99

## 100 Results

### 101 *Uncontrolled cellular proliferation: a hallmark of cancer inhibited by protein assembly modulators*

102 No hallmark of cancer is more fundamental than uncontrolled proliferation (18). Uncontrolled  
103 proliferation normally triggers cell death mechanisms, including apoptosis (19). Therefore, to survive a  
104 cancer must achieve a means of evading cell death long enough to complete cell division and reset the  
105 cell death timer. This, in turn, allows further proliferation, during which time additional mutations can  
106 occur and selection pressure will drive higher and higher grade malignancy and so on, ultimately  
107 resulting in metastasis (20). The precise regulatory feedback loops that detect uncontrolled proliferation  
108 and direct such cells to apoptosis are not well understood. If early cancers emerge where those  
109 mechanisms are impaired, it seemed plausible to us that assembly modulators identified through CFPSA  
110 phenotypic screens might include some chemotypes that restore the relevant feedback loops.  
111 Compounds capable of arresting proliferation, either directly or indirectly, would make potent anti-  
112 cancer agents especially if the delay in cancer progression would provide an opportunity for a patient's  
113 innate immune system and other homeostatic feedback loops to re-establish themselves.

114 Abnormal signaling pathways triggered by aberrant protein-protein interactions is one way that  
115 neoplastic cells are able to achieve uncontrolled proliferation (20). In order to characterize whether

116 assembly modulators could arrest the proliferation of neoplastic cells by redirecting key protein-protein  
117 interactions, we first sought to identify a cell line in which endogenous apoptosis was substantially  
118 lacking. While a successful anti-cancer compound would likely exhibit both anti-proliferative and  
119 cytotoxic efficacy, we wanted to conduct our screen under conditions where a readout measuring the  
120 arrest of proliferation would not be obscured by downstream activation of the normal cascade of events  
121 comprising cell death pathways.

122 We assessed caspase-3/7 activity in multiple tumor cell lines with an Apo-ONE assay (see **Figure**  
123 **1A**). The expected correlation between endogenous triggers of apoptotic death and cancer progression  
124 was demonstrated in the LNCaP prostate cancer progression cell model, where LNCaP-C33 early  
125 (hormone sensitive) cancer cells displayed substantially more markers of apoptosis than LNCaP-C81 late  
126 (hormone resistant) cancer cells (21). In the Apo-ONE assay, CHO K1 cells show very little endogenous  
127 apoptosis (see **Figure 1A**). Hennes-20 a CHO K1 derivative into which the human APP gene has been  
128 transfected, show even less apoptosis than their parental line (see **Figure 1A**).

129 Our collection of anti-viral assembly modulator compounds was then counter screened in  
130 Hennes-20 cells plated at low (500 cells/well) versus high (15,000 cells/well) densities and treated with  
131 DMSO (vehicle) or dose-titration of compounds. The rationale for this screen is that an intrinsically toxic  
132 compound should kill cells regardless of density, including in Hennes-20 cells. However, a compound  
133 that selectively triggers the arrest of proliferation will appear cytotoxic due to inhibition of cell growth  
134 when plated at a low density, but will appear non-toxic to cells plated at a high density where cells are  
135 approaching confluence and the readout detected by a cell viability assay is already close to the  
136 maximum.

137 Two structurally-unrelated small molecules (Tanimoto score of 41%), PAV-617 (see synthetic  
138 **Supplemental Figure 1** for chemical structure and synthetic scheme) and PAV-951 (structure not

139 disclosed) displayed the desired phenotype (see **Figures 1B** and **1C**). The Hennes results at low versus  
140 high density comparison suggested that the effect of these compounds in cells lacking endogenous  
141 apoptosis was due to inhibition of proliferation.

142 To confirm that the inhibition observed in low-density Hennes 20 cells resulted from temporary  
143 arrest of proliferation and not cell death, compound was removed after a period of treatment and cell  
144 growth was measured over the subsequent two weeks for recovery potential. The cells treated with  
145 PAV-617 and PAV-951 initially showed reduced cell density relative to the control, but once compound  
146 was removed, growth was restored over time (see **Figures 1D** and **1E**). By day 11, cell density in  
147 compound-treated cells caught up to the DMSO-treated cells (see **Figures 1D** and **1E**).

148 Since Hennes 20 cells do not appear to have endogenous apoptosis, we sought to use a different  
149 cancer cell line to assess whether that inhibition of proliferation would be accompanied by cell death.  
150 The recovery experiment was repeated in LNCaP C-33 cells which appear to have substantial  
151 endogenous apoptosis and treatment with PAV-617 and PAV-951 did inhibit cancer cell growth relative  
152 to the DMSO-treated control but the cells did not recover or grow significantly once compound was  
153 removed (see **Figures 1A**, **1F**, and **1G**).

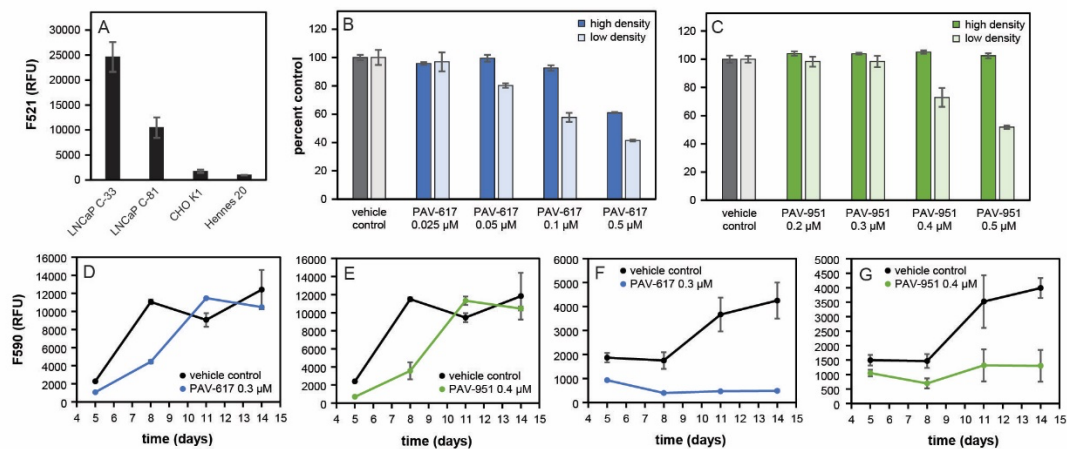

154

155 **Figure 1. Assay development and activity of hit compounds PAV-617 and PAV-951. Figure 1A** shows  
156 assessment of the endogenous apoptosis response in multiple cell lines. Plates were seeded with LNCaP  
157 C-33, LNCaP C-81, CHO K-1, and Hennes 20 cells. After three days of growth Apo-ONE reagent was added  
158 and caspase-3/7 activity was determined by fluorescent readout. Averages and standard deviation of  
159 observed activity in triplicate-repeated samples were calculated and graphed in Microsoft Excel. The  
160 Hennes 20 cell line was chosen for the counterscreen based on its low levels of caspase activity. Figures  
161 **1B** and **1C** show activity of PAV-617 and PAV-951 in the “arrest of proliferation” assay, where parallel  
162 plates of Hennes 20 cells were seeded at a high density of 15,000 cells per well and a low density of 500  
163 cells per well and treated with DMSO, PAV-617, or PAV-951 in triplicate-repeated dose titrations.  
164 Fluorescent reading (RFU) corresponding to cell viability was calculated using an AlamarBlue™ assay and  
165 the averages and standard deviations for triplicate-repeated samples were calculated and graphed on  
166 Microsoft Excel as a percentage of the DMSO-treated cells. PAV-617 exhibited dose-dependent inhibition  
167 of cell growth in the low density plate, indicating an EC50 between 0.1uM and 0.5uM. PAV-617 exhibited  
168 some toxicity to cells at the higher doses tested, indicating a CC50 slightly greater than 0.5uM. PAV-951  
169 exhibited dose-dependent inhibition of cell growth in the low-density plate, indicating an EC50 around  
170 0.5uM. PAV-951 exhibited no significant inhibition of cell growth at the tested doses in the high-density  
171 plate, indicating a CC50 greater than 0.5uM. **Figures 1D-1G** show recovery of cancer cell growth following  
172 removal of compound. Hennes 20 or LNCaP C-33 cells were seeded at a low density then incubated with  
173 DMSO, PAV-617, or PAV-951. After a period of treatment, the medium containing compound was  
174 removed and replaced with fresh media. Plates were assessed for cell viability by AlamarBlue™ on days 5,  
175 8, 11, and 14 and the averages and standard deviations of triplicate-repeat samples were calculated and  
176 graphed over time on Microsoft Excel. PAV-617 and PAV-951 treated Hennes 20 and LNCaP C-33 cells all  
177 showed reduced viability compared to matched DMSO-treated cells on day 5. However, cell growth in the  
178 Hennes 20 cells which had been treated with compound recovered with time (**Figure 1D, E**), while the  
179 LNCaP C-33 cells which had been treated with compound did not recover (**Figure 1F, G**).

180



181 *Investigating the Activities of PAV-617 and PAV-951: from modulators of viral capsid assembly to pan-*  
182 *cancer therapeutics*

183 The anti-proliferative compounds PAV-617 and PAV-951 had originally emerged from our CFPSA  
184 screen as inhibitors of viral capsid formation. The CFPSA model had been validated by demonstrating  
185 that antiviral assembly modulator hits display activity against infectious viruses in cell culture (9,11–13).  
186 PAV-617 is active against pox viruses in cell culture (13). The effective concentration for half maximal  
187 activity (EC50) of PAV-617 against monkeypox (MPXV) is approximately 300 nM (see **Figure 2A**). PAV-  
188 951 is active against HIV in cell culture with an EC50 between approximately 300 nM and 1 $\mu$ M (see  
189 **Figure 2B**).

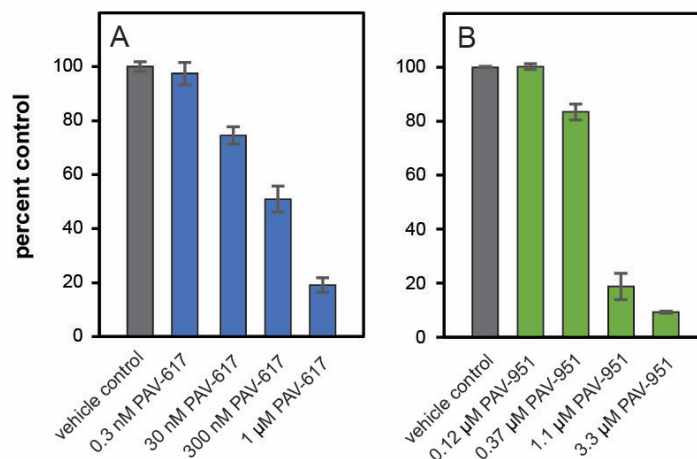

190  
191 **Figure 2. Anti-viral properties of PAV-617 and PAV-951.** Figure 2A shows activity of PAV-617 against  
192 MPXV. BSC-40 cells were infected with 100 plaque forming units of MPXV Zaire 79 and treated with PAV-  
193 617 for three days. Averages and standard deviation for plaques observed with triplicate-repeated dose-  
194 titration of PAV-617 are shown as a percentage of the plaques observed in untreated cells with an EC50 of  
195 approximately 300 nM. **Figure 2B** shows activity of PAV-951 against HIV. MT-2 cells were infected with  
196 NL4-3 Rluc HIV and treated with PAV-951 for four days. Averages and standard deviation of viral titer

197 observed with triplicate-repeated dose-titration of PAV-951 are shown as a percentage of the titer  
 198 observed in DMSO-treated cells, with an EC50 between 0.37  $\mu$ M and 1.1  $\mu$ M.

199  
 200 When PAV-617 and PAV-951 were identified as having anti-cancer activity in addition to anti-  
 201 viral properties, we suspected that the compounds might correct cancer-induced defects in protein  
 202 assembly that were related to the aberrant assembly induced by viruses to promote capsid assembly. To  
 203 get a better understanding of how the defects present themselves across diverse cancers, we assessed  
 204 the anti-cancer activity of these two compound chemotypes on a panel of 15 cancer cell lines from the  
 205 Eurofins OncoPanel™. The cell lines were derived from a variety of tissues and were representative of  
 206 male and female patients of different ages from pediatric to senior. Both PAV-617 and PAV-951 showed  
 207 pan-cancer activity with dose-dependent tumor growth inhibition in all 15 cell lines (see **Figures 3A** and  
 208 **3B**).

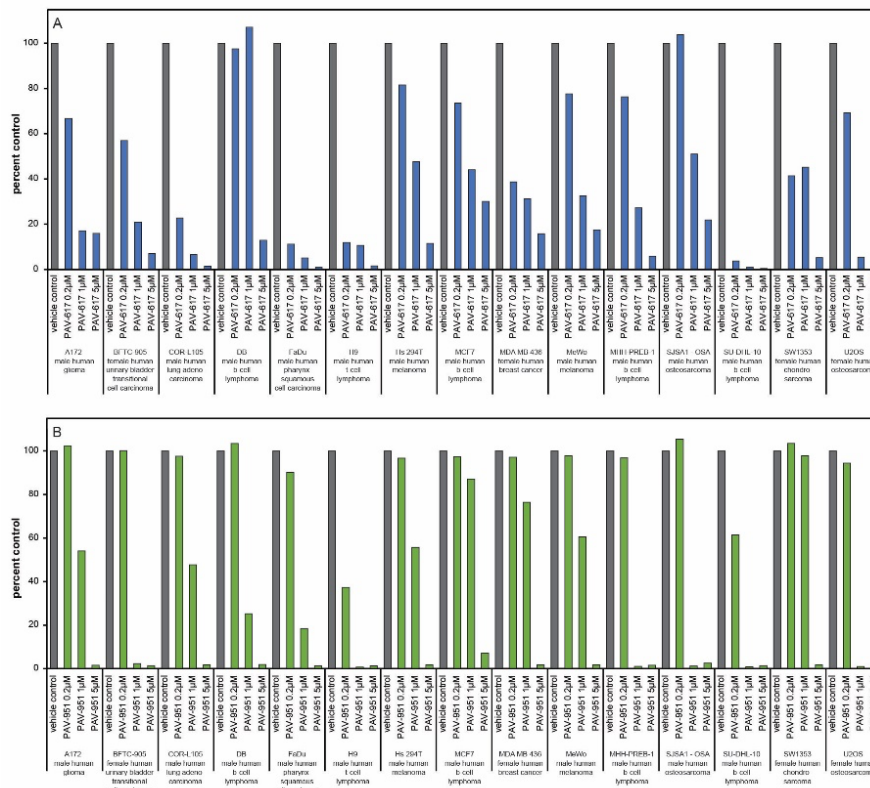

209

210 **Figure 3. Pan-cancer activity of PAV-617 and PAV-951. Figures. 3A and 3B** show results from a panel of  
211 human tumor cell lines— A172 (male human glioma), BFTC-905 (female human urinary bladder  
212 transitional cell carcinoma), COR-L105 (male human lung adenocarcinoma), DB (male human b-cell  
213 lymphoma), FaDu (male human pharynx squamous cell carcinoma), H9 (male human t-cell lymphoma), Hs  
214 294T (male human melanoma), MCF7 (female human breast cancer), MDA MB 436 (female human breast  
215 cancer), MeWo (male human melanoma), MHH-PREB-1 (male human b-cell lymphoma), SJSA1-OSA (male  
216 human osteosarcoma), SU-DHL-10 (male human b-cell lymphoma), SW1353 (female human  
217 chondrosarcoma), and U-2 OS (female human osteosarcoma). Cells were grown for 24 hours then treated  
218 with either vehicle, PAV-617, or PAV-951. Cell viability after 3 days of treatment was measured as  
219 bioluminescence intensity and averages of triplicate-repeat dose-titrations with PAV-617 and PAV-951  
220 were graphed on Microsoft Excel as percent of bioluminescence observed in DMSO-treated cells. Both  
221 compounds showed inhibitory effects in all 15 cell lines.

222

223 Confirmation of the pan-cancer activity of these compounds was received through a sixty cancer line screen  
224 carried out by the National Cancer Institute (see **Supplemental Figure 2**)

225

226 *Animal validation of PAV-617 and PAV-951 anti-cancer efficacy*

227 With demonstrated anti-viral activity, demonstrated anti-cancer activity, and data supporting a  
228 proliferation-based mechanism of action, we assessed mouse toxicology and pharmacokinetic (PK)  
229 properties in order to determine suitability for efficacy studies in an animal model.

230 The maximum tolerated dose (MTD) estimates how much compound can be administered to an  
231 animal without adverse effects (22). When administered orally to mice, both PAV-617 and PAV-951  
232 displayed MTDs greater than 20 mg/kg, which was the highest dose tested, as no clinical symptoms or  
233 significant differences were observed between vehicle and treatment groups. When administered by

234 intraperitoneal (IP) injection, the MTD of PAV-617 was safe at 10 mg/kg. When administered by IP  
235 injection, the MTD of PAV-951 was determined to be 2.5 mg/kg. Subsequently, chemical analogs of PAV-  
236 951 have been identified with MTDs of 15 mg/kg when dosed IP. Some of those analogs, including  
237 compound PAV-442, displayed comparable activity as PAV-951 against A549 lung cancer and PANC-1  
238 pancreatic cancer tumor lines in cell culture (see **Supplemental Figures 3A** and **B** for activity of PAV-  
239 442). PAV-181, a chemical analog of PAV-617, was found to be safe in mice at 20 mg/kg (higher doses  
240 were not tested). PAV-181 retained the pan-cancer activity of PAV-617 in the Eurofins OncoPanel™ (see  
241 **Supplemental Figure 3C** for the disclosed chemical structure of PAV-181 and **3D** for anti-cancer activity).

242           The PK properties are based on the absorption, distribution, metabolism, and excretion of a  
243 compound in a living organism and are necessary to determine dosing parameters because any  
244 compound designed for clinical use needs to achieve an efficacious concentration in a target organ  
245 (23,24). As an early measure of PK, we determined the concentration of compound in the plasma of rats  
246 or mice over time following one intravenous (IV), one IP, or one oral dose. Both compounds were  
247 detectable in the animals through all administration routes, though the maximum concentration  
248 achieved (C<sub>max</sub>) and rate of elimination were variable across conditions (See **Supplemental Figure 3**).

249           We determined that, while both chemical series would need optimization on the PK and  
250 toxicological properties before being named as clinical drug-candidates, PAV-617 and PAV-951 would be  
251 adequate for a preliminary animal efficacy study in order to validate whether or not the anti-  
252 proliferative properties of the compounds observed in cell culture translates to anti-proliferative  
253 properties in animals.

254           In the first set of animal efficacy studies, human A549 non-small cell lung cancer cells were  
255 grafted subcutaneously onto mice. After 30 days of tumor establishment, the animals received daily  
256 treatment with PAV-617 or PAV-951 and tumor volume was measured over time. The doses and routes

257 of administration for PAV-617 (10 mg/kg IP injection) and PAV-951 (1.5 mg/kg IV injection) were  
258 determined based on their MTD and Pk properties. The PAV-617 study was conducted for 28 days and  
259 the PAV-951 study was conducted for 14 days. As negative and positive controls, both studies included a  
260 group treated with vehicle only and a group treated with Gemcitabine hydrochloride, an FDA approved  
261 drug for non-small cell lung cancer, administered to animals in the same way as the test compound. The  
262 Gemcitabine was administered at the standard dose of 100 mg/kg. Both PAV-617 and PAV-951 reduced  
263 tumor growth significantly compared to the vehicle-only groups and performed comparably to  
264 Gemcitabine despite being administered at substantially lower doses. PAV-617 displayed a tumor  
265 growth inhibition (TGI) of 63% compared to Gemcitabine's TGI of 64% while PAV-951 had a TGI of 72%  
266 compared to Gemcitabine's TGI of 84% (see **Figures 4A** and **4B**).

267 In the second animal efficacy study, human HT-29 colorectal adenocarcinoma cells were grafted  
268 subcutaneously onto mice. After tumor establishment, the animals received treatment with vehicle, 3  
269 mg/kg PAV-951, or 60 mg/kg of a positive control drug Irinotecan. After 17 days of treatment, PAV-951  
270 had significantly reduced tumor growth relative to the vehicle-only group (TGI of 52%), though the  
271 impact was lower than Irinotecan (TGI of 108%) (See **Figure 4C**).

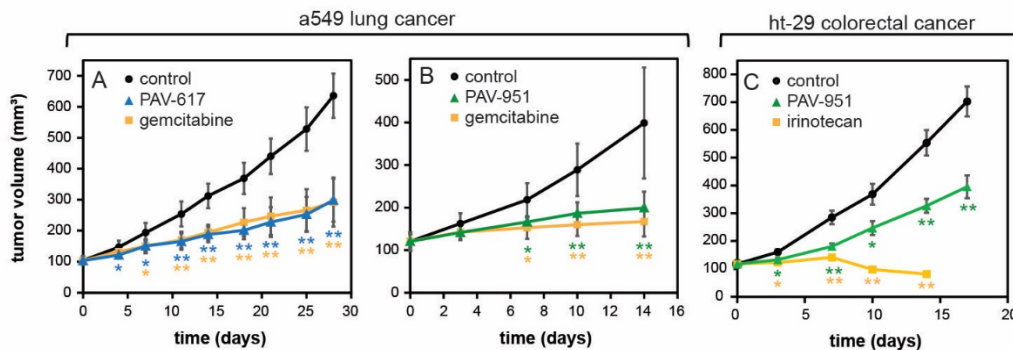

272  
273 **Figure 4. Antiproliferative activities of PAV-617 and PAV-951 in animal cancer xenografts.** Tumors were  
274 grafted onto mice via a subcutaneous injection and grown until they reached a volume of 100mm<sup>3</sup>.  
275 Animals were divided into randomized groups and treated with vehicle, PAV-617, PAV-951, or an FDA

276 approved cancer drug as a positive control. **Figure 4A** shows tumor volume across time for an A549 lung  
277 cancer treated with vehicle, PAV-617, or Gemcitabine hydrochloride. **Figure 4B** shows tumor volume  
278 across time for a A549 lung cancer treated with vehicle, PAV-951, or Gemcitabine hydrochloride. **Figure**  
279 **4C** shows tumor volume across time for a HT-29 colorectal cancer treated with vehicle, PAV-951, or  
280 Irinotecan.

### 281 *Characterizing the targets of PAV-617 and PAV-951*

282 As PAV-617 and PAV-951 were identified by a phenotypic screen, their actual targets were  
283 unknown during the early stages of compound advancement. To identify their targets, each molecule  
284 was coupled to Affi-gel resins from a position on the molecule unrelated to proliferation arrest activity  
285 based on structure-activity-relationship (SAR) exploration (see **Supplemental Figure 1B** for the synthetic  
286 scheme of the PAV-617 resin used). In that way, they could serve as target-binding ligands for drug resin  
287 affinity chromatography (DRAC) (25). LNCaP C-33 cells were chosen for DRAC starting material because  
288 we knew that PAV-617 and PAV-951 displayed efficacy against them and we wanted a model for our  
289 target engagement studies that would account for mechanisms of endogenous apoptosis responses.  
290 Extracts were prepared from LNCaP C-33 cells that were treated for 22 hours with either DMSO, PAV-  
291 617, or PAV-951. The extracts were applied to the PAV-617, PAV-951, or control drug resins, washed  
292 with 100 bed volumes of buffer, and eluted with either 100  $\mu$ M PAV-617 or 100  $\mu$ M PAV-951.

293 Samples of the DRAC eluate were sent for analysis by tandem mass spectrometry (MS-MS). The  
294 DRAC eluate from the PAV-617 and PAV-951 resins contained large sets of proteins missing from the  
295 control resin eluate. This included cancer-implicated proteins from the literature. 92 proteins from the  
296 DMSO-treated cell extracts were identified in the PAV-617 resin eluate that were not present in the  
297 control resin eluate. 116 proteins from the DMSO-treated cell extracts were identified in the PAV-951  
298 resin eluate which were not present in the control resin eluate. Of the proteins identified by MS-MS as  
299 unique or greatly enriched in the drug resin eluates, 38 proteins in the DMSO-treated cell extracts were

300 unique to PAV-617, 62 proteins in the DMSO-treated cell extracts were unique to PAV-951, and 54  
 301 proteins from the DMSO-treated cell extracts were found in both the PAV-617 and the PAV-951 resin  
 302 eluates (see **Figures 5A-C**). When the proteins detected in the eluates were searched in a database for  
 303 cancer-implicated proteins, 23 of the proteins from the PAV-617 resin eluate and 29 proteins from the  
 304 PAV-951 resin eluate were known to be part of cancer-relevant interactomes (See **Figures 5A-C**).

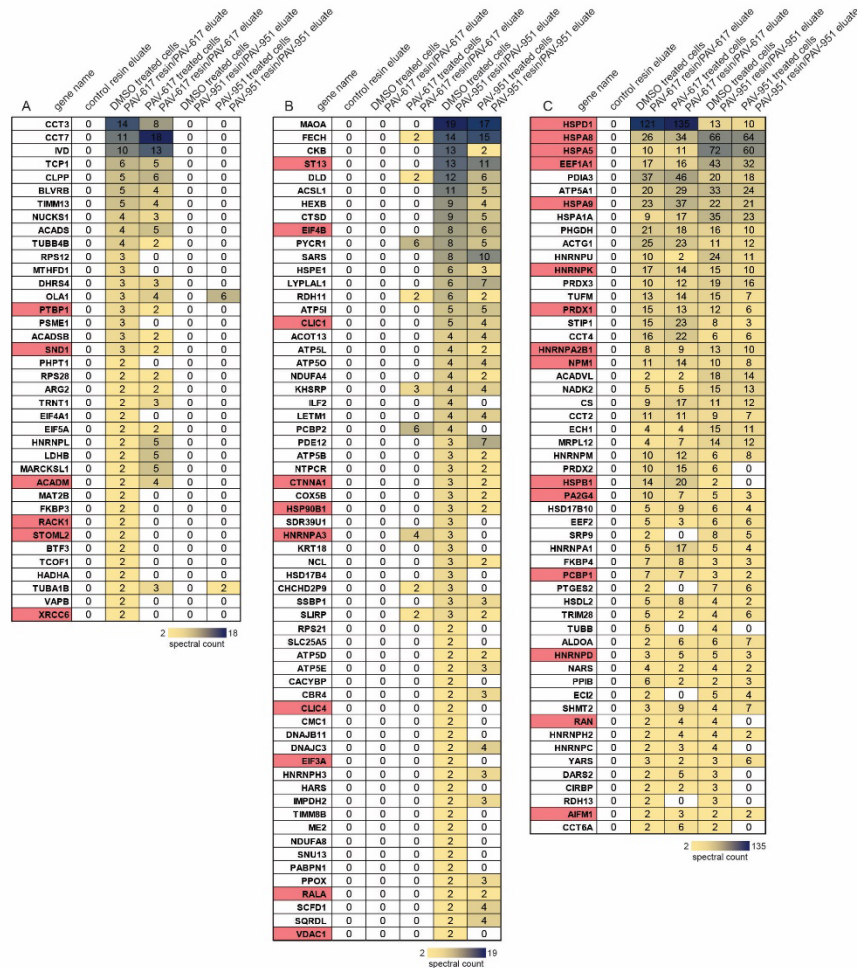

305  
 306 **Figure 5. Identification of proteins in PAV-617 and PAV-951 resin eluates by MS-MS.** DRAC experiments  
 307 were performed where 30 ul of DMSO or compound-treated LNCaP cell extract, adjusted to a protein  
 308 concentration of approximately 10 mg/ml in column buffer, was incubated on a column containing 30ul of  
 309 affigel resin coupled to either PAV-617, PAV-951, or a 4% agarose matrix (control) for one hour at 4  
 310 degrees Celsius. The input material flow-through was collected and the resin was washed with 3 mL

311 column buffer then eluted overnight at 4 degrees Celsius in 100 ul of either 100uM PAV-617 or 100uM  
312 PAV-951 in column buffer. **Figures 5A-5C** show spectral counts of proteins detected by MSMS in single-  
313 point DRAC eluates. **Figure 5A** shows the set of proteins only detected in PAV-617 resin eluate. Figure 5B  
314 shows the set of proteins only detected in the PAV-951 resin eluate. **Figure 5C** shows the set of proteins  
315 detected in both the PAV-617 and the PAV-951 resin eluates. Conditional formatting has been applied  
316 where relative abundance (by spectral count) of a given protein in a sample is visualized on a yellow-to-  
317 black scale. Proteins implicated with cancer in the Bushman labs oncogene database  
318 (<http://www.bushmanlab.org/links/genelists>) have been indicated in red.

319 The MS-MS indicated that when LNCaP C-33 cells were treated with compound, composition of  
320 the eluate was subsequently affected. For both the PAV-617 and the PAV-951 resin eluates, the spectral  
321 counts of some particular proteins detected by MS-MS increased or decreased in treatment conditions  
322 (See **Figures 5A-C**). However, for other proteins, the number of spectral counts detected in the eluates  
323 remained unchanged upon treatment. When we entered the proteins identified from the DRAC eluate  
324 into a database of protein-protein interactions, we discovered that many of the proteins eluted by  
325 either or both PAV-617 or PAV-951 were known to be involved in networks that involved frequent  
326 interactions and associations with each other (see **Supplemental Figure 5**) and relevance for cancer (see  
327 **Supplemental Figure 6**).

328 DRAC experiments were conducted side-by-side in triplicate with and without addition of  
329 metabolic energy by running the experiment at 4°C versus 22°C and supplementing with an “energy  
330 cocktail” of ribonucleotide triphosphates (1mM rATP, 1mM rGTP, 1mM rCTP, 1mM UTP) and 5ug/mL  
331 creatine kinase. Changes in the amounts of proteins that bound and eluted with PAV-617 or PAV-951  
332 were observed by western blot in the presence of these metabolic energy substrates (see **Figures 6A**  
333 and **6B**). For the PAV-617 resin eluate, B-tubulin (TUBB), KRAB-associated protein 1 (KAP1 or TRIM28),  
334 Methylenetetrahydrofolate dehydrogenase 1 (MTFGD1), and protein disulfide isomerase (PDI)—



335 proteins which had previously been identified in the eluate by MS-MS—all showed up by western blot in  
336 larger amounts under energy-supplemented conditions (See **Figure 6A**). For the PAV-951 resin eluate,  
337 MTHFD1, PDI and heterogenous ribonucleoprotein K (hnRNPK) were observed to be enhanced under  
338 energy-supplemented conditions (see **Figure 6B**). By contrast, the amount of KAP1 identified in the PAV-  
339 951 resin eluate decreased in the presence of metabolic energy substrates (see **Figure 6B**).

340 To confirm that the enrichment required the combination of metabolic energy substrates and  
341 compound rather than the presence of energy substrates alone, resins were eluted side-by-side in  
342 triplicate with either PAV-617 or PAV-951, or 1% DMSO all containing the energy cocktail. By western  
343 blot, eluates from both PAV-617 and PAV-951 resins were found to contain significant amounts of  
344 TRIM28/KAP1, MTHFD1, and PDI relative to the control resin or DMSO elution. The eluate of the PAV-  
345 617 resin contained TUBB which the PAV-951 resin eluate did not have in any greater amount than the  
346 control. The eluate of the PAV-951 resin contained hnRNPK, not present in the PAV-617 resin eluate in  
347 greater amount than the control.

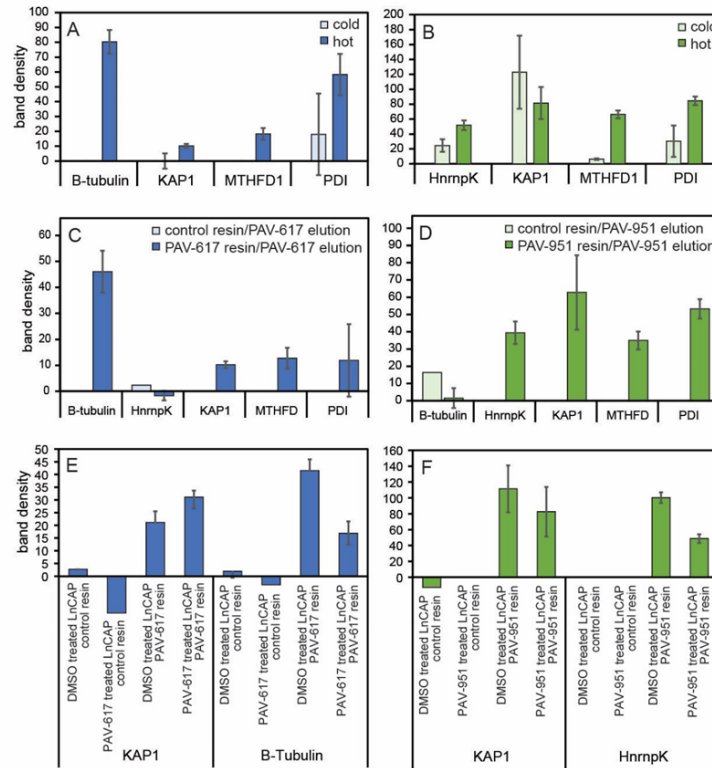

348

349

350

351

352

353

354

355

356

357

358

359

360

361

**Figure 6. Exploration of changes to PAV-617 and PAV-951 resin eluates under different conditions.** DRAC experiments using LnCAP C-33 starting extract as described in Fig. 5 were conducted under conditions which included supplementing the starting material and eluate with an energy cocktail to a final concentration of 1mM rATP, 1mM rGTP, 1mM rCTP, 1mM UTP, and 0.05 ug/mL creatine kinase and running the experiment at room temperature versus cold conditions at 4 degrees Celsius and without the energy cocktail. **Figures 6A** and **6B** show quantitation of average integrated density of protein band detected by western blot in triplicate-repeat samples eluted with PAV-617 from the PAV-617 or eluted with PAV-951 from the PAV-951 resin when DRAC was conducted side-by-side under energy-supplemented warm and non-energy-supplemented cold conditions. **Figures 6C** and **6D** show quantitation of average integrated density of protein band detected by western blot for TUBB, hnRNPK, KAP1, MTHFD1, and PDI in triplicate-repeat eluates under energy-supplemented conditions from the PAV-617 resin or PAV-951 resin and a single point elution with each compound from the control resin. Resins were eluted with either compound or 1% DMSO and the amount of protein detected in the 1% DMSO elution is

362 subtracted from the compound elution in the figure. **Figure 6E** shows quantitation of average integrated  
363 density of protein band detected by western blot for KAP1 and B-tubulin in DRAC eluates generated under  
364 energy-supplemented warm conditions of DMSO versus PAV-617 treated cells eluted with PAV-617 in  
365 triplicate from the PAV-617 resin and in single-point from the control resin. **Figure 6F** shows quantitation  
366 of average integrated density of protein band detected by western blot for KAP1 and hnRNPK in DRAC  
367 eluates generated under energy-supplemented warm conditions for DMSO versus PAV-951 treated cells  
368 eluted with PAV-951 in triplicate from the PAV-951 resin or in single-point from the control resin.

369 DRAC experiments were also carried out under conditions where the starting extract was  
370 prepared from LNCaP C-33 cells that had been treated with DMSO, 100  $\mu$ M PAV-617, or 100  $\mu$ M PAV-  
371 951 for 24 hours, in order to see if the changes to the eluate observed by MS-MS would repeat with  
372 energy supplementation. Western blots of triplicate-repeated samples showed the PAV-617 resin eluate  
373 contained increased amounts of KAP1 and decreased amounts of TUBB when cells were treated with  
374 PAV-617, meanwhile PAV-951 resin eluate showed decreased amounts of both KAP1 and hnRNPK when  
375 cells were treated with PAV-951 (See **Figures 6E-F**).

376 One explanation for why the DRAC eluates contain large numbers of proteins is that the targets  
377 for PAV-617 and PAV-951 are themselves multi-protein complexes, as had been observed for analogous  
378 studies on structurally unrelated protein assembly modulator chemical series effective in other  
379 therapeutic areas. To test this hypothesis and determine which proteins directly bind the compounds  
380 and which are indirectly associated with the compounds via protein-protein interactions involving the  
381 direct drug-binding protein(s), we modified the compounds into photocrosslinker analogs by attachment  
382 of diazirine and biotin functional groups at the same position to where the resin had previously been  
383 attached. The photocrosslinker analogs were designed so that after an incubation with cell extract that  
384 would allow the compound to bind its target, with subsequent exposure to ultraviolet light forming a  
385 covalent bond between the diazirine moiety of the compound and the nearest protein (26). The sample

386 could then be solubilized and precipitated with streptavidin beads (which bind biotin) to identify the  
387 drug-binding protein(s). The streptavidin precipitation (SAP) could be done using a native sample, which  
388 would pick up the direct drug-binding protein(s) and with it any co-associated proteins. Or the SAP could  
389 be done using a denatured sample which would, by virtue of the covalent bond to biotin, identify only  
390 the direct drug binding protein(s), with all other associated proteins of the target multi-protein complex  
391 lost upon denaturation.

392 A549 cell extract was incubated with either 1% DMSO or the photocrosslinker analogs of PAV-  
393 617 or PAV-951, then exposed to ultraviolet light. The samples were then divided into two equal parts,  
394 where one part was left native and the other denatured, then both were adjusted to non-denaturing  
395 conditions and incubated with streptavidin beads. Blots of the SAP samples for KAP1 indicate KAP1 is  
396 only a component of the PAV-617 target under native conditions and is completely lost upon  
397 denaturation (See **Figures 7A-B**). However, KAP1 is present to a significant extent in both native and  
398 denatured conditions for the SAP with the PAV-951 crosslinker (see **Figures 7A and 7C**). The SAP samples  
399 were sent for MS-MS analysis, however high background in the samples with no crosslinker added  
400 rendered the data uninformative for definitive binding partner identification (data not shown).

401 Conventional methods of drug discovery typically involve the use of recombinant proteins to  
402 measure affinity between a drug and its target (23). However, we have previously observed that protein  
403 assembly modulating compounds are specific to their target proteins only when that protein is found in  
404 particular cellular contexts/co-associations and we were concerned that if the protein-protein  
405 interactions between the direct drug-binding protein and other proteins comprises an important  
406 dimension of PAV-617 and PAV-951's targets, isolated recombinant proteins would not be an  
407 appropriate surrogate for the protein-protein interactions occurring *in vivo*. To measure target  
408 engagement for PAV-617 and PAV-951, we returned to DRAC and determined whether passing cell  
409 extract over the PAV-617 or PAV-951 resins would deplete the extracts of bindable target.

410 We applied the flow-through of PAV-617, PAV-951, and control resins to a second copy of the  
411 drug resin for these reasons and demonstrated that the drug resins deplete the extract of essentially all  
412 KAP1 capable of binding to the resins (see **Figures 7D-E**). Western blot of the resin flow-through showed  
413 that a comparable amount of KAP1 was flowing through the PAV-617, PAV-951, and control resins  
414 without binding. However, when the flow-through that had been depleted on the PAV-951 resin was  
415 applied on to a new PAV-951 resin, very little additional KAP1 bound to the second resin (see **Figure 7E**).  
416 By contrast, application of the control resin flow-through (which was not specifically depleted of  
417 anything) to a second PAV-951 resin, showed significant KAP1 binding to the second resin. Application of  
418 the PAV-617 resin flow-through to the PAV-951 resin showed significantly more KAP1 binding to the  
419 second resin than from the PAV-951 flow through, but significantly less KAP1 binding than from the  
420 control flow through (see **Figure 7E**).

421 One notable observation was that, even though the five-fold depletion by the PAV-951 resin of  
422 its target compared to the control resin was statistically significant and reproducible, it accounted for a  
423 tiny amount of the total KAP1 which had been detected by western blot in the starting extract. Only  
424 0.7% of the total amount of KAP1 detected in the starting material bound to the PAV-951 resin after  
425 passing over a control column (see **Figure 7E**). As a reference point to account for non-specific loss of  
426 material of the course of the experiment (due to denaturation over time or nonspecific sticking removed  
427 during the washing phase)—of the original PAV-951 resin with which the extract was depleted, serial  
428 elution with PAV-951 and 1% SDS showed approximately 4% of the total KAP1 detected in the original  
429 extract had bound to the resin (data not shown). We conclude that the compounds selectively target  
430 this small subfraction of KAP1 (less than 5% of the total KAP1 in the extract) because once the  
431 subfraction of KAP1 capable of binding to the resins is removed, the remaining extract will not bind  
432 anymore, even though it still contains ample KAP1.

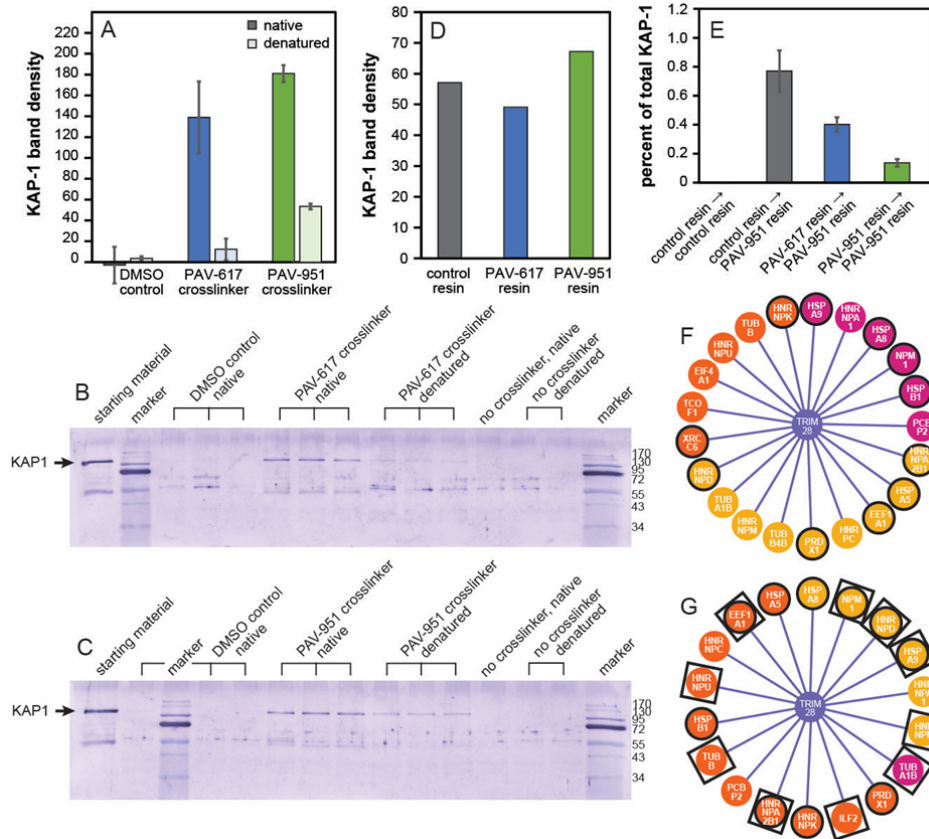

433

434 **Figure 7. A subfraction of KAP-1/TRIM28 is a component of the PAV-617 and PAV-951 target complexes.**

435 **Figure 7A** shows quantitation of average integrated density of KAP1 protein band detected by western  
 436 blot while **Figures 7B** and **7C** show the western blots themselves, in triplicate-run native and denatured  
 437 streptavidin precipitations of photo crosslinked samples. Crosslinking experiments were performed where  
 438 65  $\mu$ L of A549 cell extract was adjusted to a protein concentration of approximately 1 mg/ml in column  
 439 buffer and supplemented with the energy cocktail, with either 1% DMSO or 1 $\mu$ M modified photo  
 440 crosslinker analogs of PAV-617 and PAV-951 for one hour at room temperature then 20 minutes on ice.  
 441 The extracts were exposed to UV light then divided into two aliquots. One aliquot was left native and one  
 442 was denatured by adding DTT, SDS, and boiling. 800  $\mu$ L of column buffer with 0.1% triton was added to  
 443 both aliquots and then they were incubated with 2.5 $\mu$ L magnetic streptavidin beads for one hour at room  
 444 temperature before being denatured in loading buffer containing SDS and heated to 100°C for 3 minutes.  
 445 **Figures 7D** and **7E** show the show quantitation of integrated density of KAP1 protein band detected by

446 western blot in LNCaP extract depleted on the PAV-617, PAV-951, and control resins. 230 uL of LNCaP  
447 extract was incubated with 230uL of PAV-617, PAV-951, or control resins in single point for one hour in  
448 energy-supplemented conditions. Depleted flow-throughs were divided and put onto a subsequent PAV-  
449 951 column in triplicate or onto a subsequent control column in single-point under energy-supplemented  
450 conditions. Columns were eluted three times- a first overnight elution with PAV-951, a second overnight  
451 elution with PAV-951, and a third elution with 1% SDS. Eluates were diluted 3:1 in loading buffer and  
452 analyzed by western blot. Every western blot for the eluate included a sample of the original, un-depleted  
453 starting LNCaP extract diluted 1:100 in loading buffer. **Figure 7D** shows quantitation from when the flow-  
454 throughs from each columns were blotted for KAP1 to determine how much KAP1 had been depleted  
455 from each resin. **Figure 7E** shows the amount of protein detected in the eluate normalized as percent of  
456 their corresponding total sample, where the amount detected by eluate samples were divided by the  
457 amount detected in the starting material sample, then multiplied by 0.013 to match the concentrations.  
458 The percent detected by western blot from the two overnight elutions and the SDS elutions were added  
459 together to determine the total percentage of cellular KAP1 was binding to and eluting from the resins).  
460 **Figures 7F** and **7G** show diagrams of proteins identified by MS-MS in Figs. 5A-5C as comprising the PAV-  
461 617 resin/eluate and PAV-951 resin/eluate found in the NURSA database of protein-protein interactions  
462 as interacting with KAP1 ([https://dknet.org/about/NURSA\\_Archive](https://dknet.org/about/NURSA_Archive))(27). Orange indicates KAP1 implicated  
463 proteins detected in the eluate which decreased with treatment. Magenta indicates KAP1 implicated  
464 proteins detected in the eluate which increased with treatment. Yellow shows KAP1 implicated proteins  
465 detected in the eluate which were unchanged with drug treatment. Circles indicate proteins from the  
466 PAV-617 and PAV-951 resin eluates implicated in cancer from the Bushman lab oncogene database  
467 (<http://www.bushmanlab.org/links/genelists>). Squares indicate proteins from the PAV-951 resin eluates  
468 implicated in HIV from the virus mentha database (<https://virusmentha.uniroma2.it/>) (28).

469  
470 Several of the proteins found by MS-MS in the PAV-617 and PAV-951 resin eluates are known to  
471 interact directly with KAP1 (see **Figures 7F** and **7G**). These KAP1 implicated proteins include some whose

472 relative amount in the eluate increased and/or decreased with drug treatment and are part of cancer  
473 associated interactomes identified from the literature (see **Figures 7F** and **7G**). The KAP1 implicated  
474 proteins from the PAV-951 resin/eluate also contained several proteins that are associated with HIV in  
475 the literature (see **Figure 7G**). These associations may shed light on the cellular role played by the  
476 subfractions of KAP1 that are targeted by PAV-617 and PAV-951.

477

#### 478 Discussion

479 Our data indicate that PAV-617 and PAV-951, two protein assembly modulator anti-viral  
480 compounds selected for their ability to arrest proliferation in a distinctive way by a novel screen, are  
481 cytotoxic to a wide range of neoplastic cell lines representing both rare and common cancers. These  
482 compounds, while early in their drug optimization, performed comparably to the commercial anti-  
483 cancer drug Gemcitabine, at 10 and 60 fold lower doses, to inhibit the growth of an A549 tumor in  
484 immunodeficient mice. PAV-951 was also able to reduce growth of a HT-29 colorectal cancer in a mouse  
485 xenograft study, though to a lesser degree than the positive control Irinotecan. These data suggest that  
486 these two compounds are directed to two different targets common to a wide range of cancers, and  
487 may provide a starting point for the development of novel cancer therapeutics.

488 DRAC and photocrosslinking experiments indicate that PAV-617 and PAV-951 interact with  
489 proteins that are part of a multi-protein complex. These complexes are dynamic, as demonstrated by  
490 changes in the eluate when DRAC is carried out in the presence versus absence of metabolic energy  
491 substrates or from untreated versus compound-treated cell starting extract. Together, these findings  
492 suggest a new model for disease pathogenesis in which previously unappreciated transient multi-protein  
493 complexes plays an important role in the dynamics linking, in this case, cellular proliferation to  
494 apoptosis. We hypothesize that cancer progression is facilitated by aberrant versions of these



495 multiprotein complexes in which the linkage of inappropriate proliferation to apoptosis is attenuated or  
496 slowed. The effect of protein assembly modulating drugs is to restore the original version of the multi-  
497 protein complex, possibly through an allosteric mechanism-of-action (29).

498 KAP1/TRIM28, an identified protein component of the PAV-617 and PAV-951 target complexes,  
499 is worthy of specific mention. KAP1 was identified by both MS-MS and western blot as being part of the  
500 PAV-617 and PAV-951 targets (see **Figures 5-7**). Crosslinking experiments showed that for PAV-617 KAP1  
501 is present in a complex targeted by the compound under native conditions, but is lost upon  
502 denaturation, indicating it is not the direct drug-binding protein, but rather more likely a distal  
503 component of the target multi-protein complex (see **Figure 7**). For PAV-951, KAP1 is also part of the  
504 complex under native conditions. However the data indicates that a portion of KAP1 is a direct drug-  
505 binding protein as well. This suggests more than one copy of KAP1 per multi-protein complex (see **Figure**  
506 **7**), and is consistent with the hypothesis that KAP1 has multiple functions.

507 KAP1 stood out as being of particular interest because it is a known allosteric modulator,  
508 implicated in both infectious and noninfectious disease (30). KAP1 is involved in a variety of protein-  
509 protein interactions and an array of functions including transcriptional activation of HIV, T-cell  
510 development, DNA damage repair, as a transcriptional co-repressor for many genes, and as a ligase for  
511 post-translational modifications such as ubiquitination and SUMOylation (30,31). Studies have shown  
512 increased levels of KAP1 in many types of cancer and high levels of KAP-1 correlate with aggressive  
513 clinical phenotype and progression to metastasis (32–34). However, other described functions of KAP1  
514 are tumor suppressive and promote autophagy (30,35,36). KAP1 directly binds with other cancer-  
515 implicated proteins including MDM2, TRIM14, Fructose-1,6-biphosphatase (FBP1), MAGE-A3, MAGE-C2,  
516 Heat shock protein 70, and TWIST1 (36–40). The diversity of functions that KAP1 displays appears to be,  
517 at least in part, through its assembly into different multi-protein complexes that carry out different  
518 objectives.

519           The literature describes that KAP1 is utilized by HIV to the host's detriment but also functions as  
520 a key component of the host's immune response in repressing HIV (30,41). KAP1 is implicated as a key  
521 part of a pathway hijacked by the poxvirus p28 virulence factor (42). We show that PAV-951 is active  
522 against HIV and PAV-617 is active against MPXV in addition to their anti-cancer phenotypes (see **Figure**  
523 **2**). We hypothesize that there are shared alterations in protein assembly in neoplastic cells and virus-  
524 infected cells. Advancing the SAR of PAV-617 and PAV-951 could be utilized to determine whether the  
525 antiviral and anti-cancer targets are identical or merely similar. In the latter case, the activities would  
526 separate with further SAR. Regardless, these findings suggest that the initial CFPSA capsid assembly  
527 screen was successful in identifying novel targets relevant to both viruses and cancer.

528           We suggest that PAV-617 and PAV-951 redirect protein-protein interactions, whereby some  
529 specific proteins are recruited to, and other specific proteins are expelled from, distinct multi-protein  
530 complexes in the presence of compound (see **Supplemental Figure 7** for a diagram). KAP1 is known to  
531 both promote and suppress tumorigenesis (30). Therefore, a compound which selectively targets some  
532 forms of KAP1 and not others would be important regardless of the nature of the interaction with KAP1.  
533 In some cases, as observed for PAV-951, a portion of KAP1 is a direct drug-binding protein, although  
534 other copies of KAP1 appear not to be. In the case of PAV-617 resin, KAP1 is associated with the drug  
535 only indirectly by virtue of being a protein present in the target multi-protein complex, but at a distance  
536 from the drug-binding site, thus present by SAP under native but not denatured conditions.

537           We interpret the DRAC flow-through data to mean that, by virtue of conformation or other  
538 differences among co-associated proteins in a transient multi-protein complex, subfractions of cellular  
539 KAP1 are selectively targeted by PAV-617 and PAV-951. Results from the cross-depletion where the  
540 flow-through of the PAV-617 resin was applied to a new PAV-951 resin further indicate that the PAV-  
541 617-binding subfraction of KAP1 must be distinguishable from the PAV-951 binding subfraction of KAP1  
542 because depletion of one does not fully deplete the other (see **Figure 7E**).

543           These findings about PAV-617 and PAV-951 mirror those made for PAV-431, a structurally-  
544 unrelated protein assembly modulator with pan-respiratory antiviral activity (9). It appears as though  
545 protein assembly modulating compounds, despite structural diversity, share characteristics including the  
546 targeting of multi-protein complexes, selectivity for a small fraction of the total amount of a given  
547 protein found in a cell, and allosteric mechanisms of action (9,11,29). Furthermore, they appear to have  
548 remarkable activity across broader categories of pathogens (e.g. pan-viral family and pan-cancer) than is  
549 generally observed for existing drugs. The antiviral assembly modulators appear to have a barrier to the  
550 development of resistance (9,12). Further studies are needed to determine whether this property holds  
551 true for the anti-cancer subset of protein assembly modulators.

552           Effective cancer drugs have been developed based on a number of mechanisms including  
553 alkylating agents, antimetabolites, antimitotics, and monoclonal antibodies (43). However, as far as we  
554 know, no one has attempted to treat cancer through modulation of protein assembly, giving our work  
555 with PAV-617 and PAV-951 the potential to be both risky and rewarding. While the animal toxicity of  
556 PAV-617 and PAV-951 is higher than would be ideal for the clinic, their anti-tumor activity is already on  
557 par with existing cancer drugs and a handful of FDA approved cancer drugs have comparable toxicity  
558 gauged by mouse MTD—cisplatin has a MTD of 6 mg/kg, Doxorubicin has a MTD of 10 mg/kg, and  
559 Vinorelbine has a MTD of 10 mg/kg- and many other cancer drugs are administered to patients despite  
560 adverse effects because of the urgency of their condition (44,45). Since PAV-617 and PAV-951 are early  
561 compounds, further optimization will likely yield chemical analogs with substantially reduced toxicity  
562 and further increased activity. Indeed, we have already identified chemical analogs that demonstrate  
563 substantially increased safety in mice without losing anti-cancer activity in cells (see **Supplemental**  
564 **Figure 3**). We hypothesize that driving SAR toward compounds that are selective for restoring feedback  
565 loops of protein homeostasis will continue to improve the therapeutic indexes because the mechanism-  
566 of-action does not inherently pose a risk of toxicity/collateral damage towards normal cells.

567           Molecular genetic tools such as CRISPR, siRNA knock down, and even use of recombinant  
568 protein for protein-protein interaction studies, are unable to parse out the post-translational  
569 heterogeneity introduced into proteins as part of normal and aberrant biochemical pathways. The  
570 methods applied here are able to do so, as evidenced by the small fraction of the total of specific  
571 proteins such as KAP-1 found in the target multi-protein complex. It is perhaps not surprising that new  
572 tools, and the new targets they allow to be detected, make possible a path to drugs with novel  
573 properties. Further work will clarify whether, as we hypothesize, the transience of our targets reflects  
574 their involvement as a molecular basis for homeostasis. This conclusion, supported by the consequences  
575 of protein assembly modulator treatment both here for cancer and previously for viruses, frames future  
576 experiments to better understand this novel approach to more physiological disease therapeutics.

577

578

579

580

581

582

583

584

585

586

587

588 Supplemental Figures

589 Synthesis of A. PAV-617 and B. PAV-617 resin

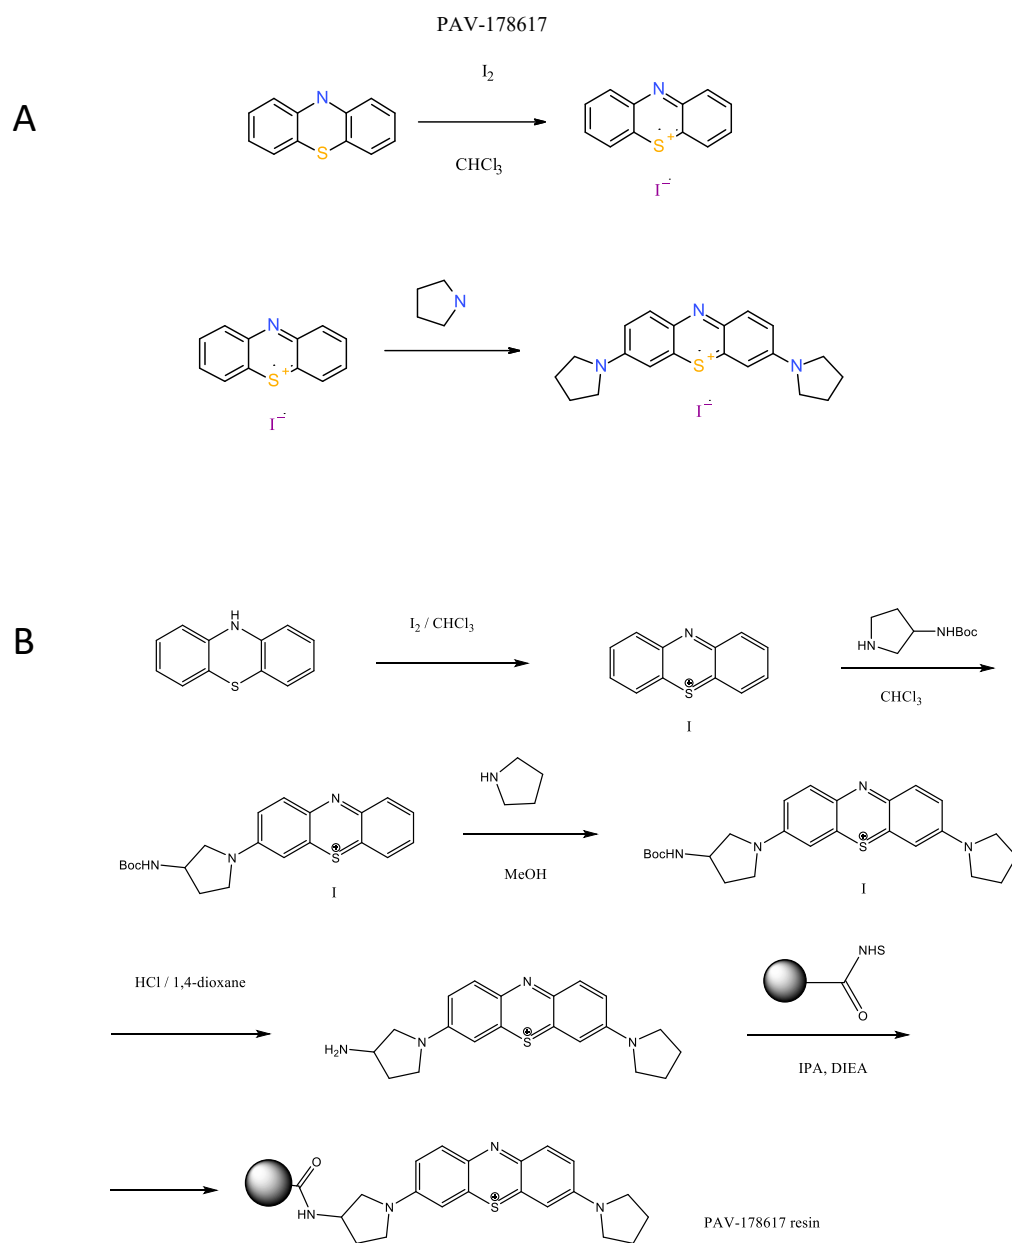

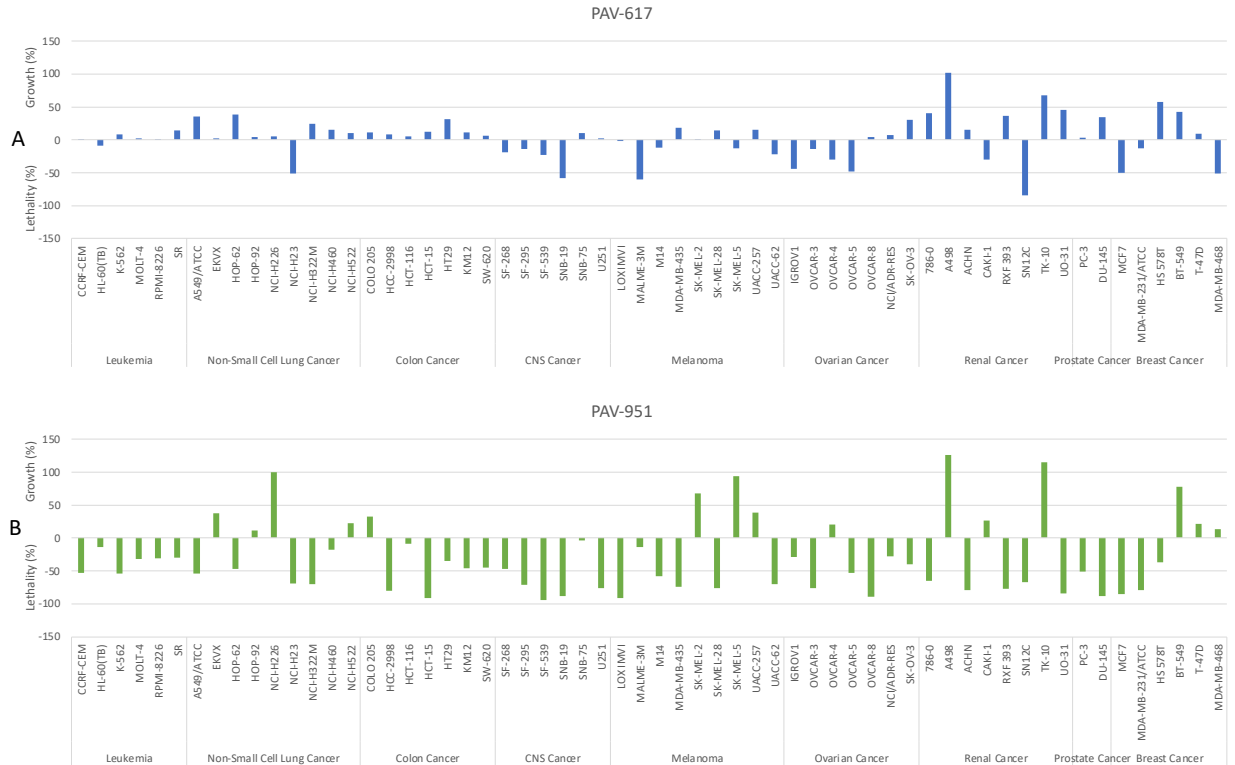

594

595

**Supplemental Figure 2.** NCI-60 Cell screen with (A) PAV-617 and (B) PAV-951. Growth percent of each cell

596

line after 48 hr treatment with 2.5  $\mu$ M PAV-617 or 2.5  $\mu$ M PAV-951 is relative to the vehicle treated

597

control and the number of cells at time zero. Values between 0 and 100 represent percent growth

598

inhibition and values between 0 and -100 represent percent cellular lethality. Figure A shows PAV-617

599

exhibiting greater than 50% growth inhibition on 37 cell lines and cellular lethality on 20 cell lines. Figure

600

B shows PAV-951 exhibiting greater than 50% growth inhibition on 9 cell lines and cellular lethality on 45

601

cell lines. These findings corroborate and extend the initial findings.

602

603

604

605

606

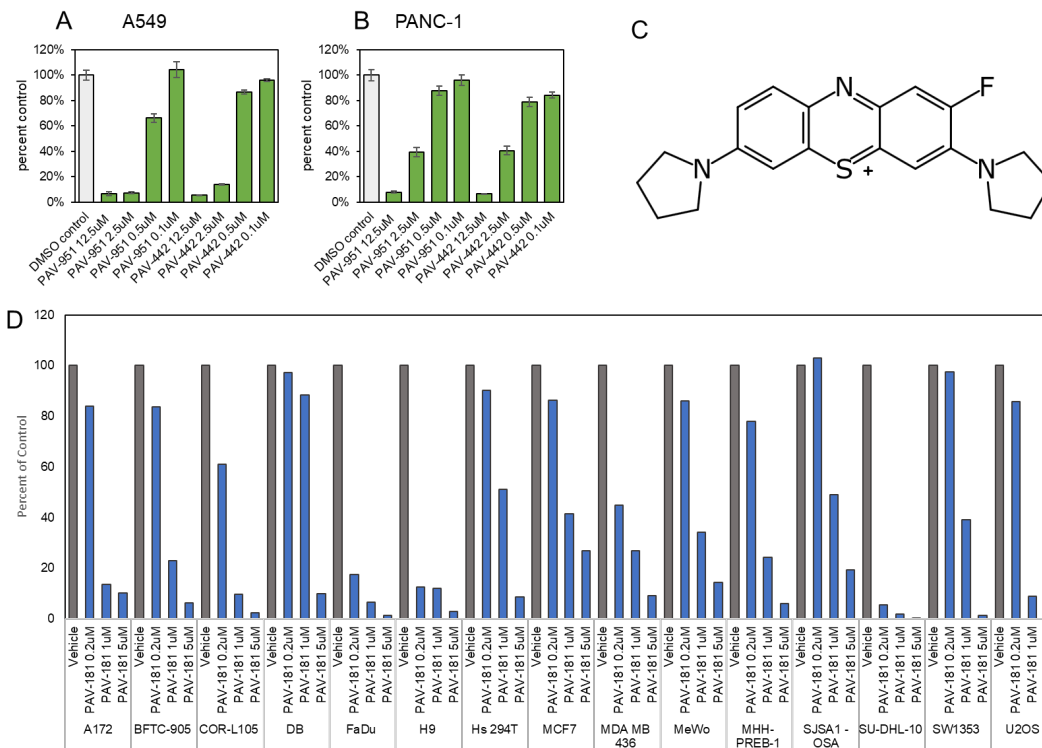

607

608

609

610

611

612

613

614

615

616

617

618

619

620

**Supplemental Figure 3. SAR optimization of the PAV-951 series.** Supplemental Figures 2A and 2B show comparable anticancer activity of PAV-951 and its less toxic (6x higher mouse MTD) chemical analog, PAV-442, on reducing growth of A549 lung cancer and PANC-1 pancreatic cancer tumor lines relative to a vehicle-only control. Supplemental Figure 2C shows the disclosed chemical structure of PAV-181, a chemical analog of PAV-617. Supplemental Figure 2D shows the activity of PAV-181 in at 5uM, 1uM, and 0.2uM against A172 (male glioma), BFTC-905 (female human urinary bladder transitional cell carcinoma), COR-L105 (male human lung adenocarcinoma), DB (male human b-cell lymphoma), FaDu (male human pharynx squamous cell carcinoma), H9 (male human t-cell lymphoma), Hs 294T (male human melanoma), MCF7 (female human breast cancer), MDA MB 436 (female human breast cancer), MeWo (male human melanoma), MHH-PREB-1 (male human b-cell lymphoma), SJSA1-OSA (male human osteosarcoma), SU-DHL-10 (male human b-cell lymphoma), SW1353 (female human chondrosarcoma), and U-2 OS (female human osteosarcoma).

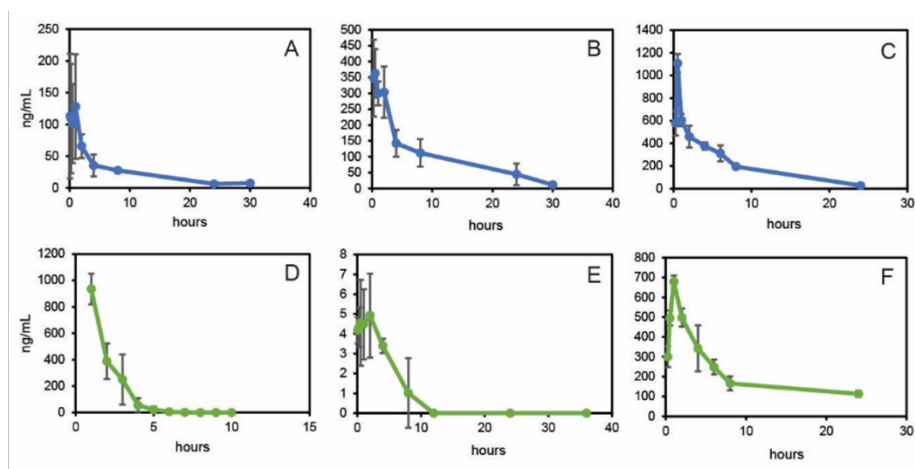

**G**

| 617 MW:336.5 |       |      |                       |               |         |
|--------------|-------|------|-----------------------|---------------|---------|
| Animal       | Route | Dose | C <sub>max</sub> (uM) | Half life (h) | MRT (h) |
| Rat          | IV    | 1    | 0.38                  | 7.84          | 7.03    |
| Rat          | IP    | 5    | 1.08                  | 7.04          | 8.31    |
| Mouse        | Oral  | 10   | 3.3                   | 5.56          | 7.66    |

**H**

| 951 MW:512.7 |       |      |                       |               |         |
|--------------|-------|------|-----------------------|---------------|---------|
| Animal       | Route | Dose | C <sub>max</sub> (uM) | Half life (h) | MRT (h) |
| Rat          | IV    | 0.5  | 1.82                  | 1.68          | 0.63    |
| Rat          | IP    | 2.5  | 0.0098                | nd            | 2.92    |
| Mouse        | Oral  | 10   | 1.32                  | 13.6          | 19.3    |

621

622

**Supplemental Figure 4. Summary of PAV-617 and PAV-951 PK properties. Supplemental Figures 3A-F**

623

show plasma concentration over time for PAV-617 and PAV-951 when given to animals via three different

624

routes of administration. Randomized treatment groups of four male Sprague Dawley rats or three CD1

625

mice were administered vehicle, PAV-617 (panel A-C), or PAV-951 (panel D-F) either IV (A, D), IP (B, E), or

626

orally (C, F) and blood samples were collected before injection as well as at different time points after

627

dosing. The concentration of compound in the plasma at different time points was measured by LC

628

MS/MS. **Supplemental Figure 4G** summarizes PK properties observed for PAV-617 based on animal,

629

administration route, and dose. **Supplemental Figure 4H** summarizes the PK properties observed for PAV-

630

951 based on animal, administration route, and dose. The maximum concentration (C<sub>max</sub>) was

631

determined to be the highest measured concentration within a dataset. The half-life and mean residence

632

time (MRT) were calculated from the values determined over time.



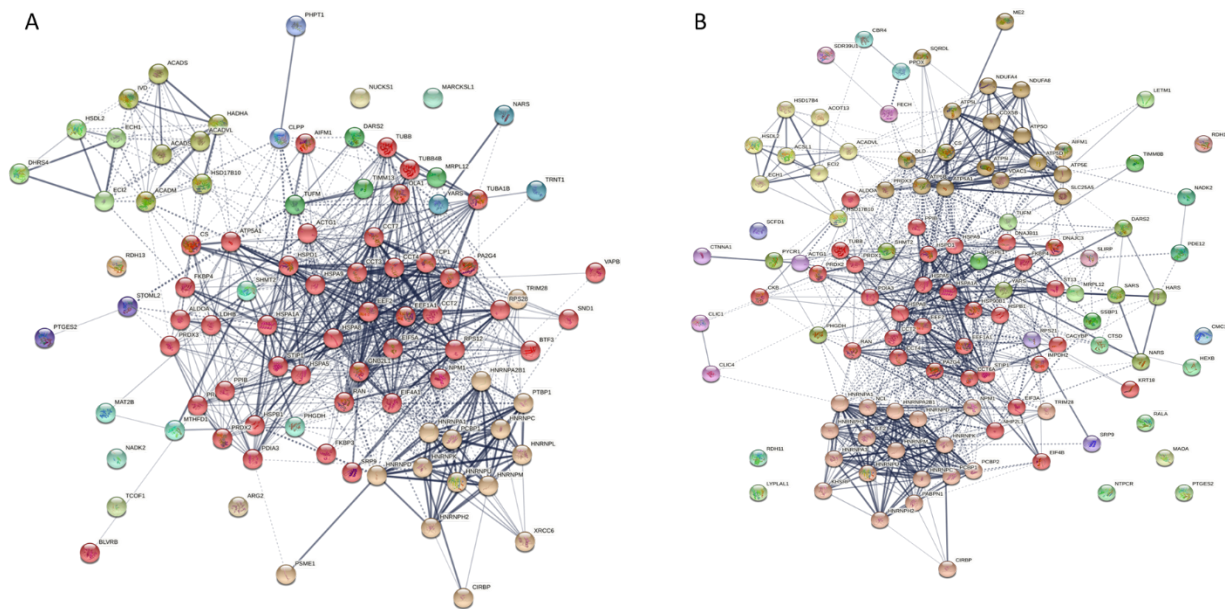

633

634

**Supplemental Figure 5. Known protein-protein interactions among PAV-617 and PAV-951 eluate**

635

**components. Supplemental Figures 5A and 5B show string-diagram analyses of the protein-protein**

636

interaction network of proteins identified in **Figures 5A-C** by tandem MSMS as comprising the PAV-617

637

(**Supplemental Figure 5A**) and PAV-951 (**Supplemental Figure 5B**) targets. Proteins were entered into the

638

string database (string-db.org). The confidence mode view is shown where the confidence level was set to

639

0.4 (medium) and MCL clustering was applied with the inflation parameter of 3. The dotted lines

640

represent edges between different clusters. The thickness of the lines represents the degree of

641

confidence for each protein-protein interaction.

642

643

644

645

646

647

No change with treatment

Upregulated with treatment

Downregulated with treatment

A

| Gene name | Control non-tissue | DMSO treated cells | PW (B) treated cells | PW (B) treated cells / PW (B) treated cells | PW (B) treated cells / PW (B) treated cells |
|-----------|--------------------|--------------------|----------------------|---------------------------------------------|---------------------------------------------|
| ACTG1     | 0                  | 25                 | 23                   |                                             |                                             |
| PRDX1     | 0                  | 15                 | 13                   |                                             |                                             |
| EEF2      | 0                  | 5                  | 3                    |                                             |                                             |
| NARS      | 0                  | 4                  | 2                    |                                             |                                             |
| TUBB4B    | 0                  | 4                  | 2                    |                                             |                                             |
| EEF1A1    | 0                  | 17                 | 16                   |                                             |                                             |
| TCP1      | 0                  | 6                  | 5                    |                                             |                                             |
| BLVRB     | 0                  | 5                  | 4                    |                                             |                                             |
| TIMM13    | 0                  | 5                  | 4                    |                                             |                                             |
| NUCKS1    | 0                  | 4                  | 3                    |                                             |                                             |
| YARS      | 0                  | 3                  | 2                    |                                             |                                             |
| ACAD5B    | 0                  | 3                  | 2                    |                                             |                                             |
| PTBP1     | 0                  | 3                  | 2                    |                                             |                                             |
| SND1      | 0                  | 3                  | 2                    |                                             |                                             |
| CCT2      | 0                  | 11                 | 11                   |                                             |                                             |
| PCBP1     | 0                  | 7                  | 7                    |                                             |                                             |
| NADK2     | 0                  | 5                  | 5                    |                                             |                                             |
| ECH1      | 0                  | 4                  | 4                    |                                             |                                             |
| DHRS4     | 0                  | 3                  | 3                    |                                             |                                             |
| ACADVL    | 0                  | 2                  | 2                    |                                             |                                             |
| ARG2      | 0                  | 2                  | 2                    |                                             |                                             |
| CIRBP     | 0                  | 2                  | 2                    |                                             |                                             |
| EIF5A     | 0                  | 2                  | 2                    |                                             |                                             |
| RPS28     | 0                  | 2                  | 2                    |                                             |                                             |
| TUFM      | 0                  | 13                 | 14                   |                                             |                                             |
| HSPA5     | 0                  | 10                 | 11                   |                                             |                                             |
| HNRNP2B1  | 0                  | 8                  | 9                    |                                             |                                             |
| FKBP4     | 0                  | 7                  | 8                    |                                             |                                             |
| CLPP      | 0                  | 5                  | 6                    |                                             |                                             |
| ACADS     | 0                  | 4                  | 5                    |                                             |                                             |
| OLA1      | 0                  | 3                  | 4                    |                                             |                                             |
| AIFM1     | 0                  | 2                  | 3                    |                                             |                                             |
| HNRNPK    | 0                  | 2                  | 3                    |                                             |                                             |
| TRNT1     | 0                  | 2                  | 3                    |                                             |                                             |
| TUBA1B    | 0                  | 2                  | 3                    |                                             |                                             |
| HNRNPM    | 0                  | 10                 | 12                   |                                             |                                             |
| PRDX3     | 0                  | 10                 | 12                   |                                             |                                             |
| HNRNPD    | 0                  | 3                  | 5                    |                                             |                                             |
| ACADM     | 0                  | 2                  | 4                    |                                             |                                             |
| HNRNP2    | 0                  | 2                  | 4                    |                                             |                                             |
| RAN       | 0                  | 2                  | 4                    |                                             |                                             |

| Gene name | Control non-tissue | DMSO treated cells | PW (B) treated cells | PW (B) treated cells / PW (B) treated cells | PW (B) treated cells / PW (B) treated cells |
|-----------|--------------------|--------------------|----------------------|---------------------------------------------|---------------------------------------------|
| HSPD1     | 0                  | 121                | 135                  |                                             |                                             |
| HSPA9     | 0                  | 23                 | 37                   |                                             |                                             |
| HNRNPA1   | 0                  | 5                  | 17                   |                                             |                                             |
| PDIA3     | 0                  | 37                 | 46                   |                                             |                                             |
| ATPSA1    | 0                  | 20                 | 29                   |                                             |                                             |
| HSPAB     | 0                  | 26                 | 34                   |                                             |                                             |
| STIP1     | 0                  | 15                 | 23                   |                                             |                                             |
| CS        | 0                  | 9                  | 17                   |                                             |                                             |
| HSPA1A    | 0                  | 9                  | 17                   |                                             |                                             |
| CCT7      | 0                  | 11                 | 18                   |                                             |                                             |
| HNRNP7    | 0                  | 0                  | 7                    |                                             |                                             |
| ECCA      | 0                  | 16                 | 22                   |                                             |                                             |
| HSPB3     | 0                  | 14                 | 20                   |                                             |                                             |
| SHMT2     | 0                  | 3                  | 9                    |                                             |                                             |
| PYCR1     | 0                  | 0                  | 6                    |                                             |                                             |
| LDHA      | 0                  | 0                  | 6                    |                                             |                                             |
| PCBP2     | 0                  | 0                  | 6                    |                                             |                                             |
| PRDX2     | 0                  | 10                 | 15                   |                                             |                                             |
| HSD17B10  | 0                  | 5                  | 9                    |                                             |                                             |
| ALDOA     | 0                  | 2                  | 6                    |                                             |                                             |
| CCT6A     | 0                  | 2                  | 6                    |                                             |                                             |
| HNRNPA3   | 0                  | 0                  | 4                    |                                             |                                             |
| KRTAP9-3  | 0                  | 0                  | 4                    |                                             |                                             |
| NPM1      | 0                  | 11                 | 14                   |                                             |                                             |
| IVD       | 0                  | 10                 | 13                   |                                             |                                             |
| HSDL2     | 0                  | 5                  | 8                    |                                             |                                             |
| NRP12     | 0                  | 4                  | 7                    |                                             |                                             |
| DARS2     | 0                  | 2                  | 5                    |                                             |                                             |
| HNRNPL    | 0                  | 2                  | 5                    |                                             |                                             |
| LDHB      | 0                  | 2                  | 5                    |                                             |                                             |
| MARCKSL1  | 0                  | 2                  | 5                    |                                             |                                             |
| CTSA      | 0                  | 0                  | 3                    |                                             |                                             |
| DHRS7     | 0                  | 0                  | 3                    |                                             |                                             |
| GCDH      | 0                  | 0                  | 3                    |                                             |                                             |
| GRPEL1    | 0                  | 0                  | 3                    |                                             |                                             |
| HIST1H2BK | 0                  | 0                  | 3                    |                                             |                                             |
| IARS2     | 0                  | 0                  | 3                    |                                             |                                             |
| KHSRP     | 0                  | 0                  | 3                    |                                             |                                             |
| DLD       | 0                  | 0                  | 2                    |                                             |                                             |
| FECH      | 0                  | 0                  | 2                    |                                             |                                             |
| RDIH1     | 0                  | 0                  | 2                    |                                             |                                             |
| CHCHD2P9  | 0                  | 0                  | 2                    |                                             |                                             |
| COX6B1    | 0                  | 0                  | 2                    |                                             |                                             |
| DCXR      | 0                  | 0                  | 2                    |                                             |                                             |
| G6PD      | 0                  | 0                  | 2                    |                                             |                                             |
| GLUD1     | 0                  | 0                  | 2                    |                                             |                                             |
| KRTAP11-1 | 0                  | 0                  | 2                    |                                             |                                             |
| PDHA1     | 0                  | 0                  | 2                    |                                             |                                             |
| PSME2     | 0                  | 0                  | 2                    |                                             |                                             |
| RPL12     | 0                  | 0                  | 2                    |                                             |                                             |
| SLRP      | 0                  | 0                  | 2                    |                                             |                                             |
| VAT1      | 0                  | 0                  | 2                    |                                             |                                             |

| Gene name | Control non-tissue | DMSO treated cells | PW (B) treated cells | PW (B) treated cells / PW (B) treated cells | PW (B) treated cells / PW (B) treated cells |
|-----------|--------------------|--------------------|----------------------|---------------------------------------------|---------------------------------------------|
| HNRNPU    | 0                  | 10                 | 2                    |                                             |                                             |
| CCT3      | 0                  | 14                 | 8                    |                                             |                                             |
| TUBB      | 0                  | 5                  | 0                    |                                             |                                             |
| PPH8      | 0                  | 5                  | 2                    |                                             |                                             |
| PHGDH     | 0                  | 21                 | 18                   |                                             |                                             |
| HNRNPK    | 0                  | 17                 | 14                   |                                             |                                             |
| PA2G4     | 0                  | 10                 | 7                    |                                             |                                             |
| TRIM28    | 0                  | 5                  | 2                    |                                             |                                             |
| MTHFD1    | 0                  | 3                  | 0                    |                                             |                                             |
| PSME1     | 0                  | 3                  | 0                    |                                             |                                             |
| RPS12     | 0                  | 3                  | 0                    |                                             |                                             |
| ECI2      | 0                  | 2                  | 0                    |                                             |                                             |
| PTGES2    | 0                  | 2                  | 0                    |                                             |                                             |
| SRP9      | 0                  | 2                  | 0                    |                                             |                                             |
| BTF3      | 0                  | 2                  | 0                    |                                             |                                             |
| EIF4A1    | 0                  | 2                  | 0                    |                                             |                                             |
| FKBP3     | 0                  | 2                  | 0                    |                                             |                                             |
| HADHA     | 0                  | 2                  | 0                    |                                             |                                             |
| MAT2B     | 0                  | 2                  | 0                    |                                             |                                             |
| PHPT1     | 0                  | 2                  | 0                    |                                             |                                             |
| RACK1     | 0                  | 2                  | 0                    |                                             |                                             |
| RDH13     | 0                  | 2                  | 0                    |                                             |                                             |
| STOML2    | 0                  | 2                  | 0                    |                                             |                                             |
| TCOF1     | 0                  | 2                  | 0                    |                                             |                                             |
| VAPB      | 0                  | 2                  | 0                    |                                             |                                             |
| XRCC6     | 0                  | 2                  | 0                    |                                             |                                             |

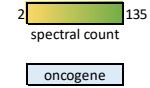

648

649

Supplemental Figure 6A

No change with treatment

Upregulated with treatment

Downregulated with treatment

B

| Gene name | Control/resin alone | DMCO treated cells<br>PAV-617/resin / PAV-951 alone | PAV-617/resin / PAV-951 alone |
|-----------|---------------------|-----------------------------------------------------|-------------------------------|
| PDIA3     | 0                   | 20                                                  | 18                            |
| HSPA8     | 0                   | 66                                                  | 64                            |
| NPM1      | 0                   | 10                                                  | 8                             |
| CCT2      | 0                   | 9                                                   | 7                             |
| PA2G4     | 0                   | 5                                                   | 3                             |
| HSD17B10  | 0                   | 6                                                   | 4                             |
| HSD17     | 0                   | 4                                                   | 2                             |
| NADK2     | 0                   | 15                                                  | 13                            |
| MRPL12    | 0                   | 14                                                  | 12                            |
| HNRNPD    | 0                   | 5                                                   | 3                             |
| EIF4B     | 0                   | 8                                                   | 6                             |
| ST13      | 0                   | 13                                                  | 11                            |
| MAD2A     | 0                   | 19                                                  | 17                            |
| ATP5A     | 0                   | 4                                                   | 2                             |
| HNRNPH2   | 0                   | 4                                                   | 2                             |
| NARS      | 0                   | 4                                                   | 2                             |
| NDUFA4    | 0                   | 4                                                   | 2                             |
| HSPA9     | 0                   | 22                                                  | 21                            |
| PCBP1     | 0                   | 3                                                   | 2                             |
| HNRNP41   | 0                   | 5                                                   | 4                             |
| EC13      | 0                   | 5                                                   | 4                             |
| PTGES2    | 0                   | 7                                                   | 6                             |
| CLIC1     | 0                   | 5                                                   | 4                             |
| ATP5B     | 0                   | 3                                                   | 2                             |
| COX5B     | 0                   | 3                                                   | 2                             |
| CTNNA1    | 0                   | 3                                                   | 2                             |
| HSP90A1   | 0                   | 3                                                   | 2                             |
| NCL       | 0                   | 3                                                   | 2                             |
| NTPCR     | 0                   | 3                                                   | 2                             |
| SLURP     | 0                   | 3                                                   | 2                             |
| CCT4      | 0                   | 6                                                   | 6                             |
| FKBP4     | 0                   | 3                                                   | 3                             |
| EEF2      | 0                   | 6                                                   | 6                             |
| ATP5A     | 0                   | 5                                                   | 5                             |
| ACOT13    | 0                   | 4                                                   | 4                             |
| AIFM1     | 0                   | 2                                                   | 2                             |
| ATP5D     | 0                   | 2                                                   | 2                             |
| ATP5O     | 0                   | 4                                                   | 4                             |
| KHSRP     | 0                   | 4                                                   | 4                             |
| LETM1     | 0                   | 4                                                   | 4                             |
| RALA      | 0                   | 2                                                   | 2                             |
| SSBP1     | 0                   | 3                                                   | 3                             |
| ACTG1     | 0                   | 11                                                  | 12                            |
| CS        | 0                   | 11                                                  | 12                            |
| PP1B      | 0                   | 2                                                   | 3                             |
| ALDOA     | 0                   | 6                                                   | 7                             |
| FECH      | 0                   | 14                                                  | 15                            |
| LYPLAL1   | 0                   | 6                                                   | 7                             |
| ATP5E     | 0                   | 2                                                   | 3                             |
| CBR4      | 0                   | 2                                                   | 3                             |
| HNRNPH3   | 0                   | 2                                                   | 3                             |
| IMPDH2    | 0                   | 2                                                   | 3                             |
| PP0X      | 0                   | 2                                                   | 3                             |
| HNRNPM    | 0                   | 6                                                   | 8                             |
| TRIM28    | 0                   | 4                                                   | 6                             |
| SARS      | 0                   | 8                                                   | 10                            |
| DNAIC3    | 0                   | 2                                                   | 4                             |
| SCFD1     | 0                   | 2                                                   | 4                             |
| SQRDL     | 0                   | 2                                                   | 4                             |

| Gene name | Control/resin alone | DMCO treated cells<br>PAV-617/resin / PAV-951 alone | PAV-617/resin / PAV-951 alone |
|-----------|---------------------|-----------------------------------------------------|-------------------------------|
| HNRNPU    | 0                   | 24                                                  | 11                            |
| HSPA5     | 0                   | 72                                                  | 60                            |
| HSPA1A    | 0                   | 35                                                  | 23                            |
| EEF1A1    | 0                   | 43                                                  | 32                            |
| CKB       | 0                   | 13                                                  | 2                             |
| ATP5A1    | 0                   | 33                                                  | 24                            |
| TUFM      | 0                   | 15                                                  | 7                             |
| PHGDH     | 0                   | 16                                                  | 10                            |
| PRDX1     | 0                   | 12                                                  | 6                             |
| PRDX2     | 0                   | 6                                                   | 0                             |
| ACSL1     | 0                   | 11                                                  | 5                             |
| DLD       | 0                   | 12                                                  | 6                             |
| HNRNPK    | 0                   | 15                                                  | 10                            |
| STIP1     | 0                   | 8                                                   | 3                             |
| HEXB      | 0                   | 9                                                   | 4                             |
| TUBB      | 0                   | 4                                                   | 0                             |
| ECH1      | 0                   | 15                                                  | 11                            |
| ACADVL    | 0                   | 18                                                  | 14                            |
| PCBP2     | 0                   | 4                                                   | 0                             |
| CTS5      | 0                   | 9                                                   | 5                             |
| RDH11     | 0                   | 8                                                   | 2                             |
| HNRNPC    | 0                   | 4                                                   | 0                             |
| ILF2      | 0                   | 4                                                   | 0                             |
| RAN       | 0                   | 4                                                   | 0                             |
| HSPD1     | 0                   | 13                                                  | 10                            |
| PRDX3     | 0                   | 19                                                  | 16                            |
| HNRNP2B1  | 0                   | 13                                                  | 10                            |
| DARS2     | 0                   | 3                                                   | 0                             |
| SRP9      | 0                   | 8                                                   | 5                             |
| HSP1      | 0                   | 6                                                   | 3                             |
| PYCR1     | 0                   | 8                                                   | 5                             |
| CHCHD2P9  | 0                   | 3                                                   | 0                             |
| CIRBP     | 0                   | 3                                                   | 0                             |
| HNRNP43   | 0                   | 3                                                   | 0                             |
| HSD17B4   | 0                   | 3                                                   | 0                             |
| KRT18     | 0                   | 3                                                   | 0                             |
| RDH13     | 0                   | 3                                                   | 0                             |
| SDR39U1   | 0                   | 3                                                   | 0                             |
| HSPB1     | 0                   | 2                                                   | 0                             |
| CCT6A     | 0                   | 2                                                   | 0                             |
| CACYP     | 0                   | 2                                                   | 0                             |
| CLIC4     | 0                   | 2                                                   | 0                             |
| CMC1      | 0                   | 2                                                   | 0                             |
| DNAJB11   | 0                   | 2                                                   | 0                             |
| EIF3A     | 0                   | 2                                                   | 0                             |
| HARS      | 0                   | 2                                                   | 0                             |
| ME2       | 0                   | 2                                                   | 0                             |
| NDUFA8    | 0                   | 2                                                   | 0                             |
| PABPN1    | 0                   | 2                                                   | 0                             |
| RPS21     | 0                   | 2                                                   | 0                             |
| SLC25A5   | 0                   | 2                                                   | 0                             |
| SNUL3     | 0                   | 2                                                   | 0                             |
| TIMMBB    | 0                   | 2                                                   | 0                             |
| VDAC1     | 0                   | 2                                                   | 0                             |

| Gene name | Control/resin alone | DMCO treated cells<br>PAV-617/resin / PAV-951 alone | PAV-617/resin / PAV-951 alone |
|-----------|---------------------|-----------------------------------------------------|-------------------------------|
| CISD3     | 0                   | 0                                                   | 2                             |
| COX4I1    | 0                   | 0                                                   | 2                             |
| GLB1      | 0                   | 0                                                   | 2                             |
| HSD17B8   | 0                   | 0                                                   | 2                             |
| MDH2      | 0                   | 0                                                   | 2                             |
| NIPSNAP1  | 0                   | 0                                                   | 2                             |
| PABPC1    | 0                   | 0                                                   | 2                             |
| RMDN1     | 0                   | 0                                                   | 2                             |
| TIMM44    | 0                   | 0                                                   | 2                             |
| TUBA18    | 0                   | 0                                                   | 2                             |
| TXN       | 0                   | 0                                                   | 2                             |
| SHM72     | 0                   | 4                                                   | 7                             |
| HARS      | 0                   | 3                                                   | 6                             |
| CNPY2     | 0                   | 0                                                   | 3                             |
| ERP29     | 0                   | 0                                                   | 3                             |
| NSUN2     | 0                   | 0                                                   | 3                             |
| PDE12     | 0                   | 3                                                   | 7                             |
| DCXR      | 0                   | 0                                                   | 4                             |
| MDH1      | 0                   | 0                                                   | 4                             |
| OLA1      | 0                   | 0                                                   | 6                             |

2 135  
spectral count

oncogene

650

651

Supplemental Figure 6B

652

Supplemental Figure 6. The same data analyzed in terms of selective vs shared proteins between the drug

653

resin in Figure 5 is here sorted by upregulation, downregulation or no change, with drug treatment for

654

PAV-617 (A) and PAV-951 (B). The oncogenes and other cancer-related proteins are highlighted here in

655

blue.

656

657

658

659

660

661

662

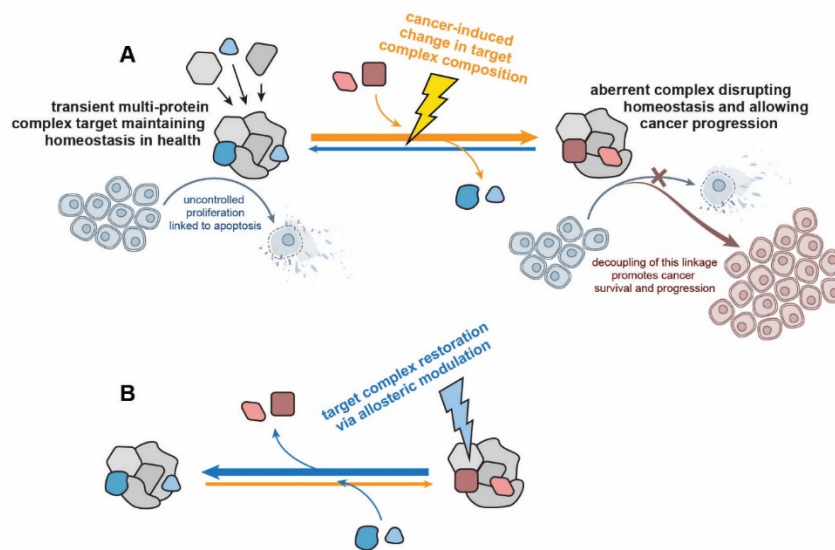

663

664

665

666

667

668

669

670

671

672

673

674

**Supplemental Figure 7. Cartoon diagram of proposed mechanism of action of assembly modulating**

**compounds. Supplemental Fig. 7A** The proposed model where a normal multi-protein complex that plays a role mediating the linkage between uncontrolled proliferation and apoptosis is modified into an aberrant multi-protein complex at an early, precancerous stage allowing cancer progression rather than homeostatic elimination. **Supplemental Figure 7B** shows the proposed mechanism where treatment with a protein assembly modulating compound restores the original multi-protein complex and its homeostatic functions, including elimination of the cancer. Allosteric modulation is indicated as a means by which these changes may be induced(46).

675 Materials and Methods

676 **Lead Contact and Materials Availability**

677 Further information and requests for resources and reagents should be directed to and will be fulfilled  
678 by the Lead Contact Vishwanath R. Lingappa ([vlingappa@prosetta.com](mailto:vlingappa@prosetta.com)).

679 Use of unique compounds PAV-617 and PAV-951 and their stable derivatives may be available upon  
680 request by the Lead Contact if sought for experimental purposes under a valid completed Materials  
681 Transfer Agreement.

682 The number of replicates carried out for each experiment is described in the figure/table legends.

683

684 **Chemical Synthesis**

685 All compounds synthesized were confirmed by LCMS with purity typically > 98%

686

687 **Synthesis of PAV-617 (see Supplemental Fig. 4A)**

688 Phenothiazin-5-ium tetraiodide hydrate

689 Phenothiazin-5-ium tetraiodide hydrate: a solution of phenothiazine (4.98 g, 25 mmol) in anhydrous  
690 chloroform (50 ml) was stirred at 50C and the solution of iodine (12.7 g, 50 mmol) in CHCl<sub>3</sub> (250 ml) was  
691 added dropwise over 4h. The resulting dark solution was stirred for an additional 3h at 50C, monitored  
692 by TLC. After the disappearance of the starting material, the resulting precipitate was filtered, washed  
693 with a copious amount of chloroform, dried overnight in vacuo to afford a dark solid (13.9 g, 74%).

694

695 3,7-Di(pyrrolidin-1-yl)phenothiazinium iodide

696 A solution of phenothiazin-5-ium tetraiodide hydrate (2.8 g, 3.6 mmol) in mixture acetonitrile/methanol  
697 (50 ml) and pyrrolidine (710 mg, 10 mmol) was stirred for 4 h at room temperature. The resulting  
698 mixture was concentrated to dryness and purified by flash chromatography using the methanol-  
699 chloroform gradient to purify the desired compound.

700

701 **Synthesis of PAV-617 resin and crosslinker (see Supplemental Fig. 4B)**

702 To 6-(tert-butoxycarbonylamino)-2-(9H-fluoren-9-ylmethoxycarbonylamino)hexanoic acid

703 [468mg (1mmol)] was added 3ml of 4N HCl and the resulting solution was stirred for 15min at room  
704 temperature. The mixture was rotary evaporated to a residue which was then sequentially treated with  
705 DMF (4ml), Diazirine 10 [128mg (1mmol)], DIEA [347ul (2mmol)] and HATU [380mg (1mmol)]. After  
706 stirring for 30min at room temperature the mixture was diluted with EtOAc (20ml) and washed with  
707 water (3x). The organic layer was dried (Mg<sub>2</sub>SO<sub>4</sub>) and the solvent removed affording the Diazirine acid  
708 11 which was used as is.

709 To the Diazirine acid 11 [24mg (0.05mmol)] was added tert-Butyl 4-aminobutanoate [8mg (0.05mmol)],  
710 DMF (1ml), DIEA [35ul (0.2mmol)] and HATU [19mg (0.05mmol)]. After stirring for 30min at room  
711 temperature the mixture was diluted with EtOAc (5ml) and washed with water (3x1ml). The organic  
712 layer was dried (Mg<sub>2</sub>SO<sub>4</sub>) and the solvent removed affording the Diazirine amide XX which was used as  
713 is.

714 The crude Diazirine amide XX was next treated with a 50% Diethylamine / DMF solution (1ml) for 1h at  
715 room temperature with mild agitation. The solvent and Diethylamine were then removed using high  
716 vacuum overnight. The residue was the treated with DMF (1ml), DIEA (one drop) and Biotin-PEG2-NHS

717 [25mg (0.05mmol)]. The mix was stirred for 12 at room temperature and again the solvent was removed  
718 using high vacuum affording the crude Biotinylated Diazirine YY.

719 The crude Biotinylated Diazirine YY was next treated with 4N HCl in Dioxane (1ml) for 30min at room  
720 temperature then the mixture was rotary evaporated to dryness. The residue was then dissolved in DMF  
721 (1ml) and then treated with DIEA [35ul (0.05mmol)], the Phenothiazinium chloride salt ZZ [21mg  
722 (0.05mmol)] and HATU [19mg (0.05mmol)]. After 30min the solvent was removed using high vacuum.  
723 The residue was the purified via reverse phase chromatography (0.1% TFA in ACN / 0.1% TFA in water)  
724 which after lyophilization afforded 24mg (47% overall yield) of the desired PAV-617 crosslinker (XYZ).

725

## 726 **Experimental Models and Subject Details**

### 727 **Animal models**

728 Maximum tolerated dose (MTD) studies were conducted using female Balb/C mice, aged 8-10 weeks or  
729 female CD1 mice, aged 5-6 weeks. Treatment groups were made up of 3 animals each, unless otherwise  
730 noted, and dosing regimens for disclosed data is provided. Animals were sacrificed at the end of the  
731 study period using an overdose of CO<sub>2</sub>. MTD studies were conducted at Vipragen Biosciences Private  
732 Limited or Radiant Research Services Private Limited in accordance with the Committee for the Purpose  
733 of Control and Supervision of Experiments on Animals (CPCSEA) guidelines and Animal Research:  
734 Reporting of In Vivo Experiments (ARRIVE) guidelines.

735 Pharmacokinetic (PK) studies were conducted in male Sprague Dawley Rats aged 8-10 weeks or male  
736 CD1 mice aged 5-6 weeks. Treatment groups were made up of 4 animals each and dosing regimens for  
737 disclosed data is provided. Animals were sacrificed at the end of the study period using an overdose of  
738 CO<sub>2</sub>. PK studies were conducted at Vipragen Biosciences Private Limited in accordance with the

739 Committee for the Purpose of Control and Supervision of Experiments on Animals (CPCSEA) guidelines  
740 and Animal Research: Reporting of In Vivo Experiments (ARRIVE) guidelines.  
741 Tumor xenograft studies were conducted using female Athymic Nude mice, strain CrTac: Ncr-Foxn1<sup>nu</sup>,  
742 aged 6-8 weeks. Tumor transplantation occurred through subcutaneous injection of a 0.1mL cell  
743 suspension containing 1 to 5x10<sup>6</sup> A549 lung cancer cells obtained from ATCC in Matrigel in PBS into the  
744 left flank region of the mice. Treatment groups were made up of 6 animals each and dosing regimens for  
745 disclosed data is provided. Animals were sacrificed at the end of the study period using an overdose of  
746 isoflurane anesthesia. Both xenograft studies were conducted at Anthem Biosciences Private Limited in  
747 Bangalore, India and were approved by the Institutional Animal Ethics committee (IAEC) of Anthem  
748 Biosciences in accordance with the Committee for the Purpose of Control and Supervision of  
749 Experiments on Animals (CPCSEA) guidelines and Animal Research: Reporting of *in vivo* Experiments  
750 (ARRIVE) guidelines.

751

## 752 **Cell lines**

753 The *in vivo* xenograft study utilized A549 (male human lung cancer) and HT-29 (female human colon  
754 cancer) cell lines. Cells were grown under sterile conditions. These studies were conducted at Anthem  
755 Biosciences Private Limited in Bangalore, India.

756 The Human tumor cell proliferation assay used A172 (male human glioma), BFTC-905 (female human  
757 urinary bladder transitional cell carcinoma), COR-L105 (male human lung adenocarcinoma), DB (male  
758 human b-cell lymphoma), FaDu (male human pharynx squamous cell carcinoma), H9 (male human t-cell  
759 lymphoma), Hs 294T (male human melanoma), MCF7 (female human breast cancer), MDA MB 436  
760 (female human breast cancer), MeWo (male human melanoma), MHH-PREB-1 (male human b-cell  
761 lymphoma), SJSA1-OSA (male human osteosarcoma), SU-DHL-10 (male human b-cell lymphoma),



762 SW1353 (female human chondrosarcoma), and U-2 OS (female human osteosarcoma) cell lines. This  
763 study was conducted by Eurofins Scientific as part of their OncoPanel™.

764 The monkey pox virus infectious virus assay used BSC-40 cells (nonhuman primate kidney) and MPXV  
765 Zaire 79 strain. These studies were conducted by the United States Army Medical Research Institute of  
766 Infectious Diseases on Fort Detrick, Maryland.

767 Human immunodeficiency virus infectious virus assay used MT-2 cells (female human t-cell leukemia)  
768 and the NL4-3 Rluc reporter virus. These studies were conducted at the University of Washington in  
769 Seattle, Washington.

770 The *in vitro* screens for apoptosis, high-density/ low-density activity, and cell growth recovery utilized  
771 the LNCaP C-33 (male human prostate cancer), LNCaP C-81 (male human prostate cancer), CHO-K1  
772 (Chinese Hamster ovary), and Hennes 20 (Chinese Hamster ovary) cell lines. Cells were grown under  
773 sterile conditions. These studies were conducted at Prosetta Biosciences in San Francisco, California.

774 The *in vitro* drug resin affinity chromatography and photocrosslinking experiments utilized A549 (male  
775 human lung cancer) or LNCaP C-33 (male human prostate cancer) cell line. Cells were grown under  
776 sterile conditions. Sterile conditions were not maintained once cells were harvested for *in vitro*  
777 experiments. These studies were conducted at Prosetta Biosciences in San Francisco, California.

778

#### 779 **National Cancer Institute Sixty Cell Line Screen**

780 The human tumor cell lines of the cancer screening panel are grown in RPMI 1640 medium containing  
781 5% fetal bovine serum and 2 mM L-glutamine. For a typical screening experiment, cells are inoculated  
782 into 96 well microtiter plates in 100  $\mu$ L at plating densities ranging from 5,000 to 40,000 cells/well  
783 depending on the doubling time of individual cell lines. After cell inoculation, the microtiter plates are

784 incubated at 37° C, 5 % CO<sub>2</sub>, 95 % air and 100 % relative humidity for 24 h prior to addition of  
785 experimental drugs.

786 After 24 h, two plates of each cell line are fixed *in situ* with TCA, to represent a measurement of  
787 the cell population for each cell line at the time of drug addition (T<sub>z</sub>). Experimental drugs are solubilized  
788 in dimethyl sulfoxide at 400-fold the desired final maximum test concentration and stored frozen prior  
789 to use. At the time of drug addition, an aliquot of frozen concentrate is thawed and diluted to twice the  
790 desired final maximum test concentration with complete medium containing 50 µg/ml gentamicin

791 Following drug addition, the plates are incubated for an additional 48 h at 37°C, 5 % CO<sub>2</sub>, 95 %  
792 air, and 100 % relative humidity. For adherent cells, the assay is terminated by the addition of cold TCA.  
793 Cells are fixed *in situ* by the gentle addition of 50 µl of cold 50 % (w/v) TCA (final concentration, 10 %  
794 TCA) and incubated for 60 minutes at 4°C. The supernatant is discarded, and the plates are washed five  
795 times with tap water and air dried. Sulforhodamine B (SRB) solution (100 µl) at 0.4 % (w/v) in 1 % acetic  
796 acid is added to each well, and plates are incubated for 10 minutes at room temperature. After staining,  
797 unbound dye is removed by washing five times with 1 % acetic acid and the plates are air dried. Bound  
798 stain is subsequently solubilized with 10 mM trizma base, and the absorbance is read on an automated  
799 plate reader at a wavelength of 515 nm. For suspension cells, the methodology is the same except that  
800 the assay is terminated by fixing settled cells at the bottom of the wells by gently adding 50 µl of 80 %  
801 TCA (final concentration, 16 % TCA). Using the seven absorbance measurements [time zero, (T<sub>z</sub>), control  
802 growth, (C), and test growth in the presence of drug at the five concentration levels (T<sub>i</sub>)], the percentage  
803 growth is calculated at each of the drug concentrations levels. Percentage growth is calculated as:

804  $[(T_i - T_z) / (C - T_z)] \times 100$  for concentrations for which  $T_i \geq T_z$

805  $[(T_i - T_z) / T_z] \times 100$  for concentrations for which  $T_i < T_z$ .

806

807

808 ***In vitro* experiments**

809 Drug resin affinity chromatography and photocrosslinking experiments, and SDS-PAGE/ silver  
810 stain/Western Blot analysis of the results, were conducted by Prosetta Biosciences in San Francisco,  
811 California under conditions described in figure legends. Results from disclosed *in vitro* experiments were  
812 repeated in triplicate unless otherwise stated. Mass spectrometry analysis of samples were conducted  
813 by MS Bioworks in Ann Arbor, Michigan.

814

815 **Method and Analysis Details**

816 **Monkey pox infectious virus assay**

817 BSC-40 cells of 95% confluence in 24-well plates were infected with 100 pfu of MPXV Zaire 79 diluted in  
818 Eagle's Minimum Essential Medium with 2% fetal bovine serum and incubated in 37 degrees Celsius in  
819 5% CO<sub>2</sub> for 1 hour. The viral inocula were removed and replaced with the test compounds in six half log  
820 dilutions (0.1 ml per well) and the cells were overlaid with 1% methylcellulose in growth media (1 ml per  
821 well). The media and virus control cells received growth medium containing 1% methylcellulose. After  
822 three days of infection, when plaques appeared, cells were stained with crystal violet for an hour and  
823 then washed with water and dried overnight. The plaques were counted the next day and virus-only  
824 wells were compared with the compound-added wells to determine percentage protection. Infected  
825 cells were stained with crystal violet and viral plaques were counted. Averages and standard deviation  
826 for plaques observed under different treatment conditions were calculated in Microsoft Excel and  
827 graphed as the percent inhibition in PAV-617 treated cells compared to untreated cells.

828

829

830 **Human immunodeficiency virus infectious virus assay**

831 MT-2 cells were preseeded in 96-well plates in 100 ul of complete RPMI. Multiple concentrations of  
832 PAV-951 were serially diluted in DMSO then into an infection media prepared by diluting NL4-3 Rluc  
833 virus stock to 400 IU/100 ul with complete RPMI, which was transferred onto the MT-2 cells with a final  
834 MOI of 0.02 and final DMSO concentration of 1% in infected places. One well received DMSO only,  
835 instead of PAV-951, and one well received medium only for normalization and background collection.  
836 Cells were incubated at 37 degrees Celsius for 96 hours. 100ul of medium was removed and discarded  
837 and 10 ul of 15 uM EnduRen luciferase substrate was added to each well, followed by incubation for 1.5  
838 hours at 37 degrees Celsius. Plates were read on a luminescence plate reader. Bioluminescence intensity  
839 was read on a Synergy H1 BioTek plate reader. Averages and standard deviation for viral titer observed  
840 under different treatment conditions were calculated in Microsoft Excel and graphed as the percent  
841 inhibition in PAV-951 treated cells compared to untreated cells.

842

843 **Apoptosis Screen**

844 A 96 well plate was seeded with Hennes 20 cells at 500 cells per well, CHO-K1 cells at 500 cells per well,  
845 LNCaP C-33 cells at 2000 cells per well, and LNCaP C-81 cells at 2000 cells per well. Cells were grown in  
846 100uL minimum essential media for three days then three wells of each cell line received treatment with  
847 1% DMSO. 12 hours after drug treatment, a mixture of 25 ul media and 25 ul Apo-ONE reagent  
848 (Promega) was added then the plate was covered and placed on a shaker at room temperature for six  
849 hours. The plate was read on a microplate reader for fluorescence at 499/521. Values were averaged  
850 and standard deviations were calculated for each triplicate condition and graphed on Microsoft Excel.

851 **High density/ low density assay**

852 Two 96 well plates were seeded with Hennes 20 cells in parallel where one was plated at a density of  
853 500 cells/well and the other was plated at a density of 15,000 cells/well. 90 ul of minimum essential  
854 media was added to each well and plates were placed in a 37 degrees Celsius incubator for 24 hours.  
855 The next day, 10ul of media containing dilutions of compound in DMSO were added to each plate in  
856 triplicate with final concentrations of 0.025 uM PAV-617, 0.05 uM PAV-617, 0.1 uM PAV-617, 0.5 uM  
857 PAV-617, 0.02 uM PAV-951, 0.3 uM PAV-951, 0.4 uM PAV-951, or 0.5 uM PAV-951. Six wells on each  
858 plate received 10ul of media containing only DMSO. Each well was gently mixed 5 times with a 100ul  
859 pipette. Plates were incubated at 37 degrees Celsius for 72 hours then 10 uL of alamarBlue was added to  
860 each well. Wells were mixed 5 times then incubated at 37 degrees Celsius for 72 hours. Plates were then  
861 read at 530/590. Values were averaged and standard deviations were calculated for each triplicate  
862 condition and graphed on Microsoft Excel.

863

864 **Cell growth recovery assay**

865 A 96 well plate was seeded with either Hennes 20 or LNCaP C-33 cells at 500 cells/well in 90 uL of  
866 minimum essential media and incubated at 37 degrees Celsius for 24 hours. 0.5% DMSO was diluted in  
867 media and added to 6 control wells for each plate. PAV-617 was diluted in media and added to three  
868 wells at a concentration of 0.3 uM. PAV-951 was diluted in media and added to concentration of 0.4 uM.  
869 After 24 hours of PAV-617 treatment or 6 hours of PAV-951 treatment, the medium containing  
870 compound was removed and replaced with fresh media. After 72 hours (day 5), plates were assayed  
871 with alamarBlue and fluorescence was read at 530/590. The medium containing alamarBlue was  
872 removed and replaced with fresh media. After another 72 hours (day 8) plates were assayed with  
873 alamarBlue and fluorescence again, then medium containing alamarBlue was removed and replaced

874 with fresh media. After a final 72 hour incubation (day 11) plates were assayed with alamarBlue one  
875 more time. Average fluorescence for each day and treatment condition were plotted on Microsoft Excel  
876 with standard deviation calculated to provide error bars.

877

#### 878 **Human tumor cell proliferation assay**

879 A panel of human tumor cell lines (A172, BFTC-905, COR-L105, DB, FaDu, H9, Hs 294T, MCF7, MDA MB  
880 436, MeWo, MHH-PREB-1, SJSA1-OSA, SW1353, and U2OS) were grown in RPMI 1640, 10% FBS, 2 mM L-  
881 alanyl-L-glutamine, 1 mM Na pyruvate. Cells were seeded into 384-well plates and incubated in a  
882 humidified atmosphere with 5% CO<sub>2</sub> at 37C. After 24 hours of incubation DMSO, PAV-617, or PAV-951  
883 was added at concentrations of 5 uM, 1 uM, and 0.2 uM and plates were incubated for 3 days. Then  
884 cells were lysed with CellTiter-Glo (Promega) which generates a bioluminescence signal relative to ATP  
885 levels and is used as a measurement of viable cells. Bioluminescence was read by a PerkinElmer Envision  
886 microplate reader. Bioluminescence intensity was measured by a PerkinElmer Envision microplate  
887 reader and transformed to a percent of control (POC) using the formula:  $POC = (Ix/I0) * 100$ , where Ix is  
888 the whole well signal intensity at a given treatment, and I0 is the average intensity of the untreated  
889 vehicle wells. Values were averaged for each triplicate condition and graphed on Microsoft Excel.

890

#### 891 **Screening for SAR**

892 A549 and PANC1 cells were seeded at a density of 1,250 cell/well in 100ulo of media/well. Plates were  
893 incubated at 37 degrees Celsius and 5% CO<sub>2</sub> for 24 hours. DMSO, PAV-951, or its analog PAV-442 were  
894 added to media at final concentrations of 0.1 uM, 0.5uM, 2.5 uM, or 12.5uM in 0.5% DMSO. The treated  
895 plates were incubated at 37 degrees celsius for 72 hours than analyzed by AlamarBlue.

## 896 **Mouse maximum tolerated dose determination**

897 For the intraperitoneal MTD study, female Balb/c mice aged 8-10 weeks were randomly divided into  
898 treatment groups with three animals per group. Animals in each treatment group were weighed and  
899 received one IP injection of 0.1-0.15mL containing either vehicle (10% DMSO, 45% propylene glycol, 45%  
900 sterile water), 1mg/kg PAV-617, 2 mg/kg PAV-617, 5 mg/kg PAV-617, 10 mg/kg PAV-617, 1mg/kg PAV-  
901 951, 2.5 mg/kg PAV-951, 5mg/kg PAV-951 or 10 mg/kg PAV-951. Animals were observed from day 0  
902 until day 3 for clinical signs of toxicity. Animals were euthanized after 72 hours and were examined  
903 externally and internally by a pathologist for abnormalities in organ weight and tissue damage. Blood  
904 samples were sent for a complete blood count bioanalysis. MTD was determined to be the dose at  
905 which no signs of toxicity were observed by any parameters.

906 For the oral MTD study, female CD1 mice aged 5-6 weeks were given either an oral dose of vehicle (10%  
907 DMSO, 45% propylene glycol, 45% sterile water) or either 10 mg/kg or 20 mg/kg of PAV-617 or PAV-951.  
908 The vehicle and 20 mg/kg groups had three animals each, while the 10 mg/kg groups only had one  
909 animal. Animals were observed for clinical signs and after a week they were euthanized and examined  
910 externally and internally by a pathologist for changes related to toxicity.

911

## 912 **Pharmacokinetics studies**

913 For the IP and IV PK studies, male Sprague Dawley rats aged 8-10 weeks were randomly divided into  
914 treatment groups with four animals per group. Animals in each treatment group were weighed and  
915 received one 2.4 mL intravenous dose of either vehicle (10% DMSO, 45% propylene glycol, 45% sterile  
916 water), 1mg/kg PAV-617, or 0.5 mg/kg PAV-951, or one intraperitoneal dose of either vehicle (100%  
917 labrasol), 5mg/kg PAV-617 or 2.5 mg/kg PAV-951 . Blood was collected from a pre-cannulated line  
918 before dosing, and subsequently 15 minutes, 30 minutes, 1 hour, 2 hours, 4 hours, 8 hours, 12 hours, 24

919 hours, and 30 hours post-dosing. Concentration of drug in the plasma over time was measured using a  
920 Waters Acquity TQD LCMS/MS. Maximum concentration (C<sub>max</sub>) was determined to be the maximum  
921 concentration detected in a dataset. Half life, area under the curve, and mean residence time were  
922 calculated with Phoenix WinNolin software.

923 For the oral PK studies, male CD1 mice aged 5-6 weeks were randomly divided into treatment groups  
924 with three animals per group. Animals in each treatment group were weighed and received, via oral  
925 gavage needle, either one oral dose of vehicle (10% DMSO, 45% propylene glycol, 45% sterile water), 10  
926 mg/kg PAV-617, or 10 mg/kg PAV-951. Blood was collected from a pre-cannulated line before dosing,  
927 and subsequently 2 minutes, 5 minutes, 15 minutes, 30 minutes, 1 hour, 2 hours, 4 hours, 6 hours, 8  
928 hours, and 24 hours post-dosing. Concentration of drug in the plasma over time was measured using a  
929 Waters Acquity TQD LCMS/MS. Maximum concentration (C<sub>max</sub>) was determined to be the maximum  
930 concentration detected in a dataset. Half life, area under the curve, and mean residence time were  
931 calculated with Phoenix WinNolin software.

932

### 933 **A549 xenograft studies**

934 A549 cells growing in RPMI-1640 medium were suspended with Matrigel in PBS. 0.1 ml of cell  
935 suspension containing  $1 \times 10^6$  cells were injected subcutaneously into the left flank region of female, 6-8  
936 weeks old nude mice (CrTac: Ncr-Foxn1nu). After 30 days of tumor establishment, mice were divided  
937 randomly into treatment groups. In the PAV-617 study, 6 animals were treated with vehicle only (10%  
938 DMSO, 10% propylene glycol, 80% sterile water) by IP once daily, 6 animals were treated with 100  
939 mg/kg Gemcitabine Hydrochloride by IP twice weekly, and 6 animals were treated with 10 mg/kg PAV-  
940 617 by IP once daily for 28 days. In the PAV-951 study, 6 animals were treated with vehicle only (10%  
941 DMSO, 10% propylene glycol, 80% sterile water) by IV once daily, 6 animals were treated with 100



942 mg/kg Gemcitabine by IV twice weekly, and 6 animals were treated with 1.5 mg/kg PAV-951 by IV once  
943 daily for 14 days. In both studies, mice were weighed and their tumors were measured using a digital  
944 Vernier caliper. Tumor volume was calculated using the formula:  $(L \times W^2)/2$  where L is the largest  
945 diameter and W is the smallest diameter of the tumor. Statistical analysis was performed using Graph  
946 Pad Prism (Ver. 5.03). Statistical analysis of tumor growth inhibition between the Control and Treated  
947 groups was performed by using One-way ANOVA followed by Dunnett's test.

948

#### 949 **HT-29 xenograft study**

950 HT-29 cells growing in HBSS medium were suspended in Matrigel. 0.1 mL of the cell suspension  
951 containing  $5 \times 10^6$  cells were injected subcutaneously into the left flank region of male, 6-8 week old SCID  
952 mice. After tumor establishment, animals were divided randomly into groups of 6 and treated daily by IV  
953 with vehicle daily for 17 days, 3 mg/kg PAV-951 three times per week for 17 days, or treated by IP with  
954 60 mg/kg Irinotecan every 4 days for 14 days. Tumor volume was calculated using the formula:  $(L \times$   
955  $W^2)/2$  where L is the largest diameter and W is the smallest diameter of the tumor. Statistical analysis  
956 was performed using Graph Pad Prism (Ver. 5.03). Statistical analysis of tumor growth inhibition  
957 between the Control and Treated groups was performed by using One-way ANOVA followed by  
958 Dunnett's test.

959

#### 960 **Drug Resin affinity chromatography**

961 LNCaP C-33 cells were grown in minimum essential media (UCSF) with 10% FBS and 1% Penstrep for 24  
962 hours then treated with 500nM PAV-617, 500nM PAV-951, or DMSO for 22 hours. Cells were scraped  
963 into cold phosphate buffered saline (PBS) (10mM sodium phosphate, 150 mM sodium chloride pH 7.4),

964 then spun at 1,000 rpm for 10 minutes until pelleted. The PBS was decanted and the pellet resuspended  
965 in a low salt buffer (10mM HEPES pH 7.6, 10mM NaCl, 1mM MgAc with 0.35% Tritonx100) then  
966 centrifuged at 10,000 rpm for 10 minutes at 4o C. The post-mitochondrial supernatant was removed and  
967 adjusted to a concentration of approximately 10 mg/ml and equilibrated in a physiologic column buffer  
968 (50 mM Hepes ph 7.6, 100 mM KAc, 6 mM MgAc, 1 mM EDTA, 4mM TGA). In some conditions, the  
969 extract was supplemented with an energy cocktail (to a final concentration of 1mM rATP, 1mM rGTP,  
970 1mM rCTP, 1mM rUTP, and 5 ug/mL creatine kinase). 30 ul or 230 ul of extract was then incubated for  
971 one hour at either 4°C or 22°C on 30 ul or 230 ul of affigel resin coupled to either PAV-617, PAV-951, or a  
972 4% agarose matrix (control). The input material was collected and the resin was then washed with 3 ml  
973 column bufffer. The resins were eluted overnight at either 4 °C or at 22°C in 100ul or 330ul column  
974 buffer containing either 100uM PAV-617 or 100uM PAV-951 or DMSO, with or without the energy  
975 cocktail. Eluates were run on SDS-PAGE with samples for silver stain and/or western blot or sent for  
976 mass spectrometry analysis.

977

### 978 **Chemical photocrosslinking**

979 A549 extract was prepared as above then adjusted to a protein concentration of approximately 1 mg/ml  
980 in column buffer containing 0.01% triton and supplemented with the energy cocktail (to a final  
981 concentration of 1mM rATP, 1mM rGTP, 1mM rCTP, 1mM UTP, and 5 ug/mL creatine kinase).  
982 Photocrosslinker analogs of PAV-617 and PAV-951 chemically modified to contain biotin and a diazirine  
983 group or 1% DMSO were added to 67 ul of extract at 100uM, incubated for one hour at 22°C followed by  
984 20 minutes on ice, then exposed to ultraviolet light for 5 minutes at 22°C. After crosslinking, samples  
985 were divided in two 30 ul aliquots and one set was denatured by adding 5 ul of 10% SDS, 0.625 ul DTT,  
986 and boiling for 5 minutes. Both native and denatured aliquots were then diluted in 800 ul column buffer

987 containing 0.1% triton. 2.5 ul of magnetic streptavidin beads (Pierce) were added to all samples and  
988 mixed for one hour at room temperature to capture all biotinylated proteins and co-associated proteins.  
989 Samples were placed on a magnetic rack to hold the beads in place and washed three times with 800 ul  
990 of column buffer containing 0.1% triton. After washing, beads were resuspended in 80 ul of gel loading  
991 buffer containing SDS and analyzed by western blot or blot for affinity purified streptavidin. Samples  
992 were analyzed by western blot.

993

#### 994 **Silver Stain**

995 SDS/PAGE gels were incubated overnight in a fixative (50% methanol, 10% acetic acid, 40% water), then  
996 for an hour in 50% methanol (done as two washes), and an hour in water (done as two washes). The gels  
997 were sensitized in 0.02% sodium thiosulfate for one minute then washed twice for 30 seconds with  
998 water. The gels were incubated for 30 minutes in cold 0.1% silver nitrate with 0.02% formaldehyde then  
999 washed twice for 30 seconds. The gels were developed in 3% sodium carbonate with 0.02%  
1000 formaldehyde. The developed gels showing the pattern of protein bands was scanned and the image  
1001 was analyzed.

1002

#### 1003 **Western blotting**

1004 SDS/PAGE gels were transferred in Towbin buffer (25mM Tris, 192mM glycine, 20% w/v methanol) to  
1005 polyvinylidene fluoride membrane, blocked in 1% bovine serum albumin (BSA) in PBS, incubated  
1006 overnight at 4 degrees Celsius in a 1:1,000 dilution of 100ug/mL affinity-purified primary IGG to KAP-1,  
1007 MTHFD1, hnrnpK, TUBB, or PDI in 1% BSA in PBS containing 0.1% Tween-20 (PBST). Membranes were  
1008 then washed twice in PBST and incubated for two hours at room temperature in a 1:5000 dilution of

1009 secondary anti-rabbit or anti-mouse antibody coupled to alkaline phosphatase in PBST. Membranes  
1010 were washed two more times in PBST then incubated in a developer solution prepared from 100 uL of  
1011 7.5 mg/mL 5-bromo-4-chloro-3-indolyl phosphate dissolved in 60% dimethyl formamide (DMF) in water  
1012 and 100ul of 15 mg/ml nitro blue tetrazolium dissolved in 70% DMF in water, adjusted to 50mL with 0.1  
1013 Tris (pH 9.5) and 0.1 mM magnesium chloride. Membranes were scanned and the integrated density of  
1014 protein band was measured on ImageJ. Averages and the standard deviation between repeated  
1015 experiments were calculated and plotted on Microsoft Excel.

1016

### 1017 **Tandem mass spectrometry**

1018 Samples were processed by SDS PAGE using a 10% Bis-tris NuPAGE gel with the MES buffer system. The  
1019 mobility region was excised and washed with 25 mM ammonium bicarbonate followed by 15mM  
1020 acetonitrile. Samples were reduced with 10 mM dithiothreitol and 60 degrees Celsius followed by  
1021 alkylation with 50 mM iodoacetamide at room temperature. Samples were then digested with trypsin  
1022 (Promega) overnight (18 hours) at 37 °C then quenched with formic acid and desalted using an Empore  
1023 SD plate. Half of each digested sample was analyzed by LC-MS/MS with a Waters NanoAcquity HPLC  
1024 system interfaced to a ThermoFisher Q Exactive. Peptides were loaded on a trapping column and eluted  
1025 over a 75uM analytical column at 350 nL/min packed with Luna C18 resin (Phenomenex). The mass  
1026 spectrometer was operated in a data dependent mode, with the Oribtrap operating at 60,000 FWHM  
1027 and 15,000 FWHM for MS and MS/MS respectively. The fifteen most abundant ions were selected for  
1028 MS/MS.

1029 Data was searched using a local copy of Mascot (Matrix Science) with the following parameters: Enzyme:  
1030 Trypsin/P; Database: SwissProt Human (concatenated forward and reverse plus common contaminants);  
1031 Fixed modification: Carbamidomethyl (C) Variable modifications: Oxidation (M), Acetyl (N-term), Pyro-

1032 Glu (N-term Q), Deamidation (N/Q) Mass values: Monoisotopic; Peptide Mass Tolerance: 10 ppm;  
1033 Fragment Mass Tolerance: 0.02 Da; Max Missed Cleavages: 2. The data was analyzed by label free  
1034 quantitation (LFQ) and spectral count methods. LFQ intensity values of each condition were measured in  
1035 triplicate and compared against each other to generate log<sub>2</sub> fold change values for each combination of  
1036 conditions. Spectral counts were filtered for a 1% protein/peptide false discovery rate requiring 2 unique  
1037 peptides per protein and the data set was further adjusted by subtraction of spectral counts for specific  
1038 proteins observed in the control resin. Identified proteins were searched in the NURSA database of  
1039 protein-protein interactions ([https://dknet.org/about/NURSA\\_Archive](https://dknet.org/about/NURSA_Archive)) to determine if they interact  
1040 with KAP-1, the Bushman labs oncogene database (<http://www.bushmanlab.org/links/genelists>) to  
1041 determine if they were known to be implicated in cancer, and the VirusMentha database  
1042 (<https://virusmentha.uniroma2.it/>) to determine if they interact with HIV. String diagrams of protein-  
1043 protein interaction networks were generated using the STRING database (string-db.org).

1044

1045 **Acknowledgements:**

1046 We thank the National Cancer Institute for running the sixty cell line screen described in Supplemental  
1047 Figure 2. We thank Usha F. Lingappa for help with the figures, Dmitry Temnikov for IT support, Halley  
1048 McCormick for help with data analysis, and Jairam R. Lingappa for valuable suggestions during  
1049 manuscript preparation.

1050

1051 **Competing interests:**

1052 Vishwanath R. Lingappa is CEO of Prosetta Biosciences.

1053

1054 References

- 1055 1. Javier RT, Butel JS. The History of Tumor Virology. *Cancer Res.* 2008 Oct 1;68(19):7693–706.
- 1056 2. Morales-Sánchez A, Fuentes-Pananá E. Human Viruses and Cancer. *Viruses.* 2014 Oct 23;6(10):4047–  
1057 79.
- 1058 3. Ison MG. Antivirals and resistance: influenza virus. *Curr Opin Virol.* 2011 Dec;1(6):563–73.
- 1059 4. Kaján GL, Doszpoly A, Tarján ZL, Vidovszky MZ, Papp T. Virus–Host Coevolution with a Focus on  
1060 Animal and Human DNA Viruses. *J Mol Evol.* 2020 Jan;88(1):41–56.
- 1061 5. Usman RM, Razzaq F, Akbar A, Farooqui AA, Iftikhar A, Latif A, et al. Role and mechanism of  
1062 autophagy-regulating factors in tumorigenesis and drug resistance. *Asia Pac J Clin Oncol.* 2021  
1063 Jun;17(3):193–208.
- 1064 6. Cirone M. EBV and KSHV Infection Dysregulates Autophagy to Optimize Viral Replication, Prevent  
1065 Immune Recognition and Promote Tumorigenesis. *Viruses.* 2018 Oct 31;10(11):599.
- 1066 7. Krump NA, You J. Molecular mechanisms of viral oncogenesis in humans. *Nat Rev Microbiol.* 2018  
1067 Nov;16(11):684–98.
- 1068 8. O’Shea CC. Viruses: tools for tumor target discovery, and agents for oncolytic therapies – an  
1069 introduction. *Oncogene.* 2005 Nov 21;24(52):7636–9.
- 1070 9. Müller-Schiffmann A, Michon M, Lingappa AF, Yu SF, Du L, Deiter F, et al. A Pan-respiratory Antiviral  
1071 Chemotype Targeting a Transient Host Multiprotein Complex [Internet]. *Biochemistry*; 2022 Jul [cited  
1072 2022 Sep 7]. Available from: <http://biorxiv.org/lookup/doi/10.1101/2021.01.17.426875>
- 1073 10. Broce S, Hensley L, Sato T, Lehrer-Graiwer J, Essrich C, Edwards KJ, et al. Biochemical and  
1074 biophysical characterization of cell-free synthesized Rift Valley fever virus nucleoprotein capsids  
1075 enables in vitro screening to identify novel antivirals. *Biol Direct.* 2016 Dec;11(1):25.
- 1076 11. Lingappa UF, Wu X, Macieik A, Yu SF, Atuegbu A, Corpuz M, et al. Host–rabies virus protein–  
1077 protein interactions as druggable antiviral targets. *Proc Natl Acad Sci* [Internet]. 2013 Mar 5 [cited  
1078 2022 May 13];110(10). Available from: <https://pnas.org/doi/full/10.1073/pnas.1210198110>

- 1079 12. Reed JC, Solas D, Kitaygorodskyy A, Freeman B, Ressler DTB, Phuong DJ, et al. Identification of an  
1080 Antiretroviral Small Molecule That Appears To Be a Host-Targeting Inhibitor of HIV-1 Assembly.  
1081 Simon V, editor. *J Virol*. 2021 Jan 13;95(3):e00883-20.
- 1082 13. Priyamvada L, Burgado J, Baker-Wagner M, Kitaygorodskyy A, Olson V, Lingappa VR, et al. New  
1083 methylene blue derivatives suggest novel anti-orthopoxviral strategies. *Antiviral Res*. 2021  
1084 Jul;191:105086.
- 1085 14. Copley SD. Moonlighting is mainstream: Paradigm adjustment required. *BioEssays*. 2012  
1086 Jul;34(7):578–88.
- 1087 15. Jeffery CJ. Multitalented actors inside and outside the cell: recent discoveries add to the number  
1088 of moonlighting proteins. *Biochem Soc Trans*. 2019 Dec 20;47(6):1941–8.
- 1089 16. Jeffery CJ. Protein moonlighting: what is it, and why is it important? *Philos Trans R Soc B Biol Sci*.  
1090 2018 Jan 19;373(1738):20160523.
- 1091 17. Hanahan D, Weinberg RA. Hallmarks of Cancer: The Next Generation. *Cell*. 2011  
1092 Mar;144(5):646–74.
- 1093 18. Hanahan D, Weinberg RA. The Hallmarks of Cancer. *Cell*. 2000 Jan;100(1):57–70.
- 1094 19. Pucci B, Kasten M, Giordano A. Cell Cycle and Apoptosis. *Neoplasia*. 2000 Jul;2(4):291–9.
- 1095 20. Pfeffer C, Singh A. Apoptosis: A Target for Anticancer Therapy. *Int J Mol Sci*. 2018 Feb  
1096 2;19(2):448.
- 1097 21. Igawa T, Lin FF, Lee MS, Karan D, Batra SK, Lin MF. Establishment and characterization of  
1098 androgen-independent human prostate cancer LNCaP cell model. *The Prostate*. 2002 Mar  
1099 1;50(4):222–35.
- 1100 22. Gad SC. Maximum Tolerated Dose. In: *Encyclopedia of Toxicology* [Internet]. Elsevier; 2014  
1101 [cited 2022 Jun 27]. p. 164. Available from:  
1102 <https://linkinghub.elsevier.com/retrieve/pii/B9780123864543008745>

- 1103 23. Hughes J, Rees S, Kalindjian S, Philpott K. Principles of early drug discovery: Principles of early  
1104 drug discovery. *Br J Pharmacol*. 2011 Mar;162(6):1239–49.
- 1105 24. Reichel A, Lienau P. Pharmacokinetics in Drug Discovery: An Exposure-Centred Approach to  
1106 Optimising and Predicting Drug Efficacy and Safety. In: Nielsch U, Fuhrmann U, Jaroch S, editors. *New*  
1107 *Approaches to Drug Discovery* [Internet]. Cham: Springer International Publishing; 2015 [cited 2022  
1108 Jun 27]. p. 235–60. (*Handbook of Experimental Pharmacology*; vol. 232). Available from:  
1109 [http://link.springer.com/10.1007/164\\_2015\\_26](http://link.springer.com/10.1007/164_2015_26)
- 1110 25. Tanaka A. Identification of the Specific Binding Proteins of Bioactive Small Compound Using  
1111 Affinity Resins. In: Koga H, editor. *Reverse Chemical Genetics* [Internet]. Totowa, NJ: Humana Press;  
1112 2009 [cited 2022 Jul 7]. p. 181–95. (*Methods in Molecular Biology*; vol. 577). Available from:  
1113 [http://link.springer.com/10.1007/978-1-60761-232-2\\_14](http://link.springer.com/10.1007/978-1-60761-232-2_14)
- 1114 26. MacKinnon AL, Taunton J. Target Identification by Diazirine Photo-Cross-Linking and Click  
1115 Chemistry. *Curr Protoc Chem Biol*. 2009 Dec;1(1):55–73.
- 1116 27. Malovannaya A, Lanz RB, Jung SY, Bulyanko Y, Le NT, Chan DW, et al. Analysis of the Human  
1117 Endogenous Coregulator Complexome. *Cell*. 2011 May;145(5):787–99.
- 1118 28. Calderone A, Licata L, Cesareni G. VirusMentha: a new resource for virus-host protein  
1119 interactions. *Nucleic Acids Res*. 2015 Jan 28;43(D1):D588–92.
- 1120 29. Motlagh HN, Hilser VJ. Agonism/antagonism switching in allosteric ensembles. *Proc Natl Acad*  
1121 *Sci*. 2012 Mar 13;109(11):4134–9.
- 1122 30. Randolph K, Hyder U, D’Orso I. KAP1/TRIM28: Transcriptional Activator and/or Repressor of Viral  
1123 and Cellular Programs? *Front Cell Infect Microbiol*. 2022;12:834636.
- 1124 31. Iyengar S, Farnham PJ. KAP1 Protein: An Enigmatic Master Regulator of the Genome. *J Biol*  
1125 *Chem*. 2011 Jul;286(30):26267–76.
- 1126 32. Addison JB, Koontz C, Fugett JH, Creighton CJ, Chen D, Farrugia MK, et al. KAP1 Promotes  
1127 Proliferation and Metastatic Progression of Breast Cancer Cells. *Cancer Res*. 2015 Jan 15;75(2):344–  
1128 55.



- 1129 33. Cui Y, Yang S, Fu X, Feng J, Xu S, Ying G. High Levels of KAP1 Expression Are Associated with  
1130 Aggressive Clinical Features in Ovarian Cancer. *Int J Mol Sci.* 2014 Dec 26;16(1):363–77.
- 1131 34. Yu C, Zhan L, Jiang J, Pan Y, Zhang H, Li X, et al. KAP-1 is overexpressed and correlates with  
1132 increased metastatic ability and tumorigenicity in pancreatic cancer. *Med Oncol.* 2014 Jul;31(7):25.
- 1133 35. Neo SH, Itahana Y, Alagu J, Kitagawa M, Guo AK, Lee SH, et al. TRIM28 Is an E3 Ligase for ARF-  
1134 Mediated NPM1/B23 SUMOylation That Represses Centrosome Amplification. *Mol Cell Biol.* 2015 Aug  
1135 15;35(16):2851–63.
- 1136 36. Yang Y, Fiskus W, Yong B, Atadja P, Takahashi Y, Pandita TK, et al. Acetylated hsp70 and KAP1-  
1137 mediated Vps34 SUMOylation is required for autophagosome creation in autophagy. *Proc Natl Acad  
1138 Sci.* 2013 Apr 23;110(17):6841–6.
- 1139 37. Fong K wing, Zhao JC, Song B, Zheng B, Yu J. TRIM28 protects TRIM24 from SPOP-mediated  
1140 degradation and promotes prostate cancer progression. *Nat Commun.* 2018 Dec;9(1):5007.
- 1141 38. Jin X, Pan Y, Wang L, Zhang L, Ravichandran R, Potts PR, et al. MAGE-TRIM28 complex promotes  
1142 the Warburg effect and hepatocellular carcinoma progression by targeting FBP1 for degradation.  
1143 *Oncogenesis.* 2017 Apr;6(4):e312–e312.
- 1144 39. Wang C, Ivanov A, Chen L, Fredericks WJ, Seto E, Rauscher FJ, et al. MDM2 interaction with  
1145 nuclear corepressor KAP1 contributes to p53 inactivation. *EMBO J.* 2005 Sep 21;24(18):3279–90.
- 1146 40. Wei C, Cheng J, Zhou B, Zhu L, Khan MdA, He T, et al. Tripartite motif containing 28 (TRIM28)  
1147 promotes breast cancer metastasis by stabilizing TWIST1 protein. *Sci Rep.* 2016 Sep;6(1):29822.
- 1148 41. Allouch A, Di Primio C, Alpi E, Lusic M, Arosio D, Giacca M, et al. The TRIM Family Protein KAP1  
1149 Inhibits HIV-1 Integration. *Cell Host Microbe.* 2011 Jun;9(6):484–95.
- 1150 42. Huang J, Huang Q, Zhou X, Shen MM, Yen A, Yu SX, et al. The Poxvirus p28 Virulence Factor Is an  
1151 E3 Ubiquitin Ligase. *J Biol Chem.* 2004 Dec;279(52):54110–6.
- 1152 43. Falzone L, Salomone S, Libra M. Evolution of Cancer Pharmacological Treatments at the Turn of  
1153 the Third Millennium. *Front Pharmacol.* 2018 Nov 13;9:1300.

1154 44. Aston WJ, Hope DE, Nowak AK, Robinson BW, Lake RA, Lesterhuis WJ. A systematic investigation  
1155 of the maximum tolerated dose of cytotoxic chemotherapy with and without supportive care in mice.  
1156 BMC Cancer. 2017 Dec;17(1):684.

1157 45. Singh S, Singh P. Pattern and impact of drugs targeted toward toxicity amelioration in patients  
1158 receiving cancer chemotherapy. Perspect Clin Res. 2018;9(1):23.

1159 46. Fenton AW. Allosteric: an illustrated definition for the 'second secret of life.' Trends Biochem Sci.  
1160 2008 Sep;33(9):420–5.

1161

1162
